# Supplementary material
Source: PubMed Central journal article supplement (PMC4369342)
Supplement: NIHMS512515-supplement-2.pdf [file NIHMS512515-supplement-2.pdf]

# Supp Figure 2

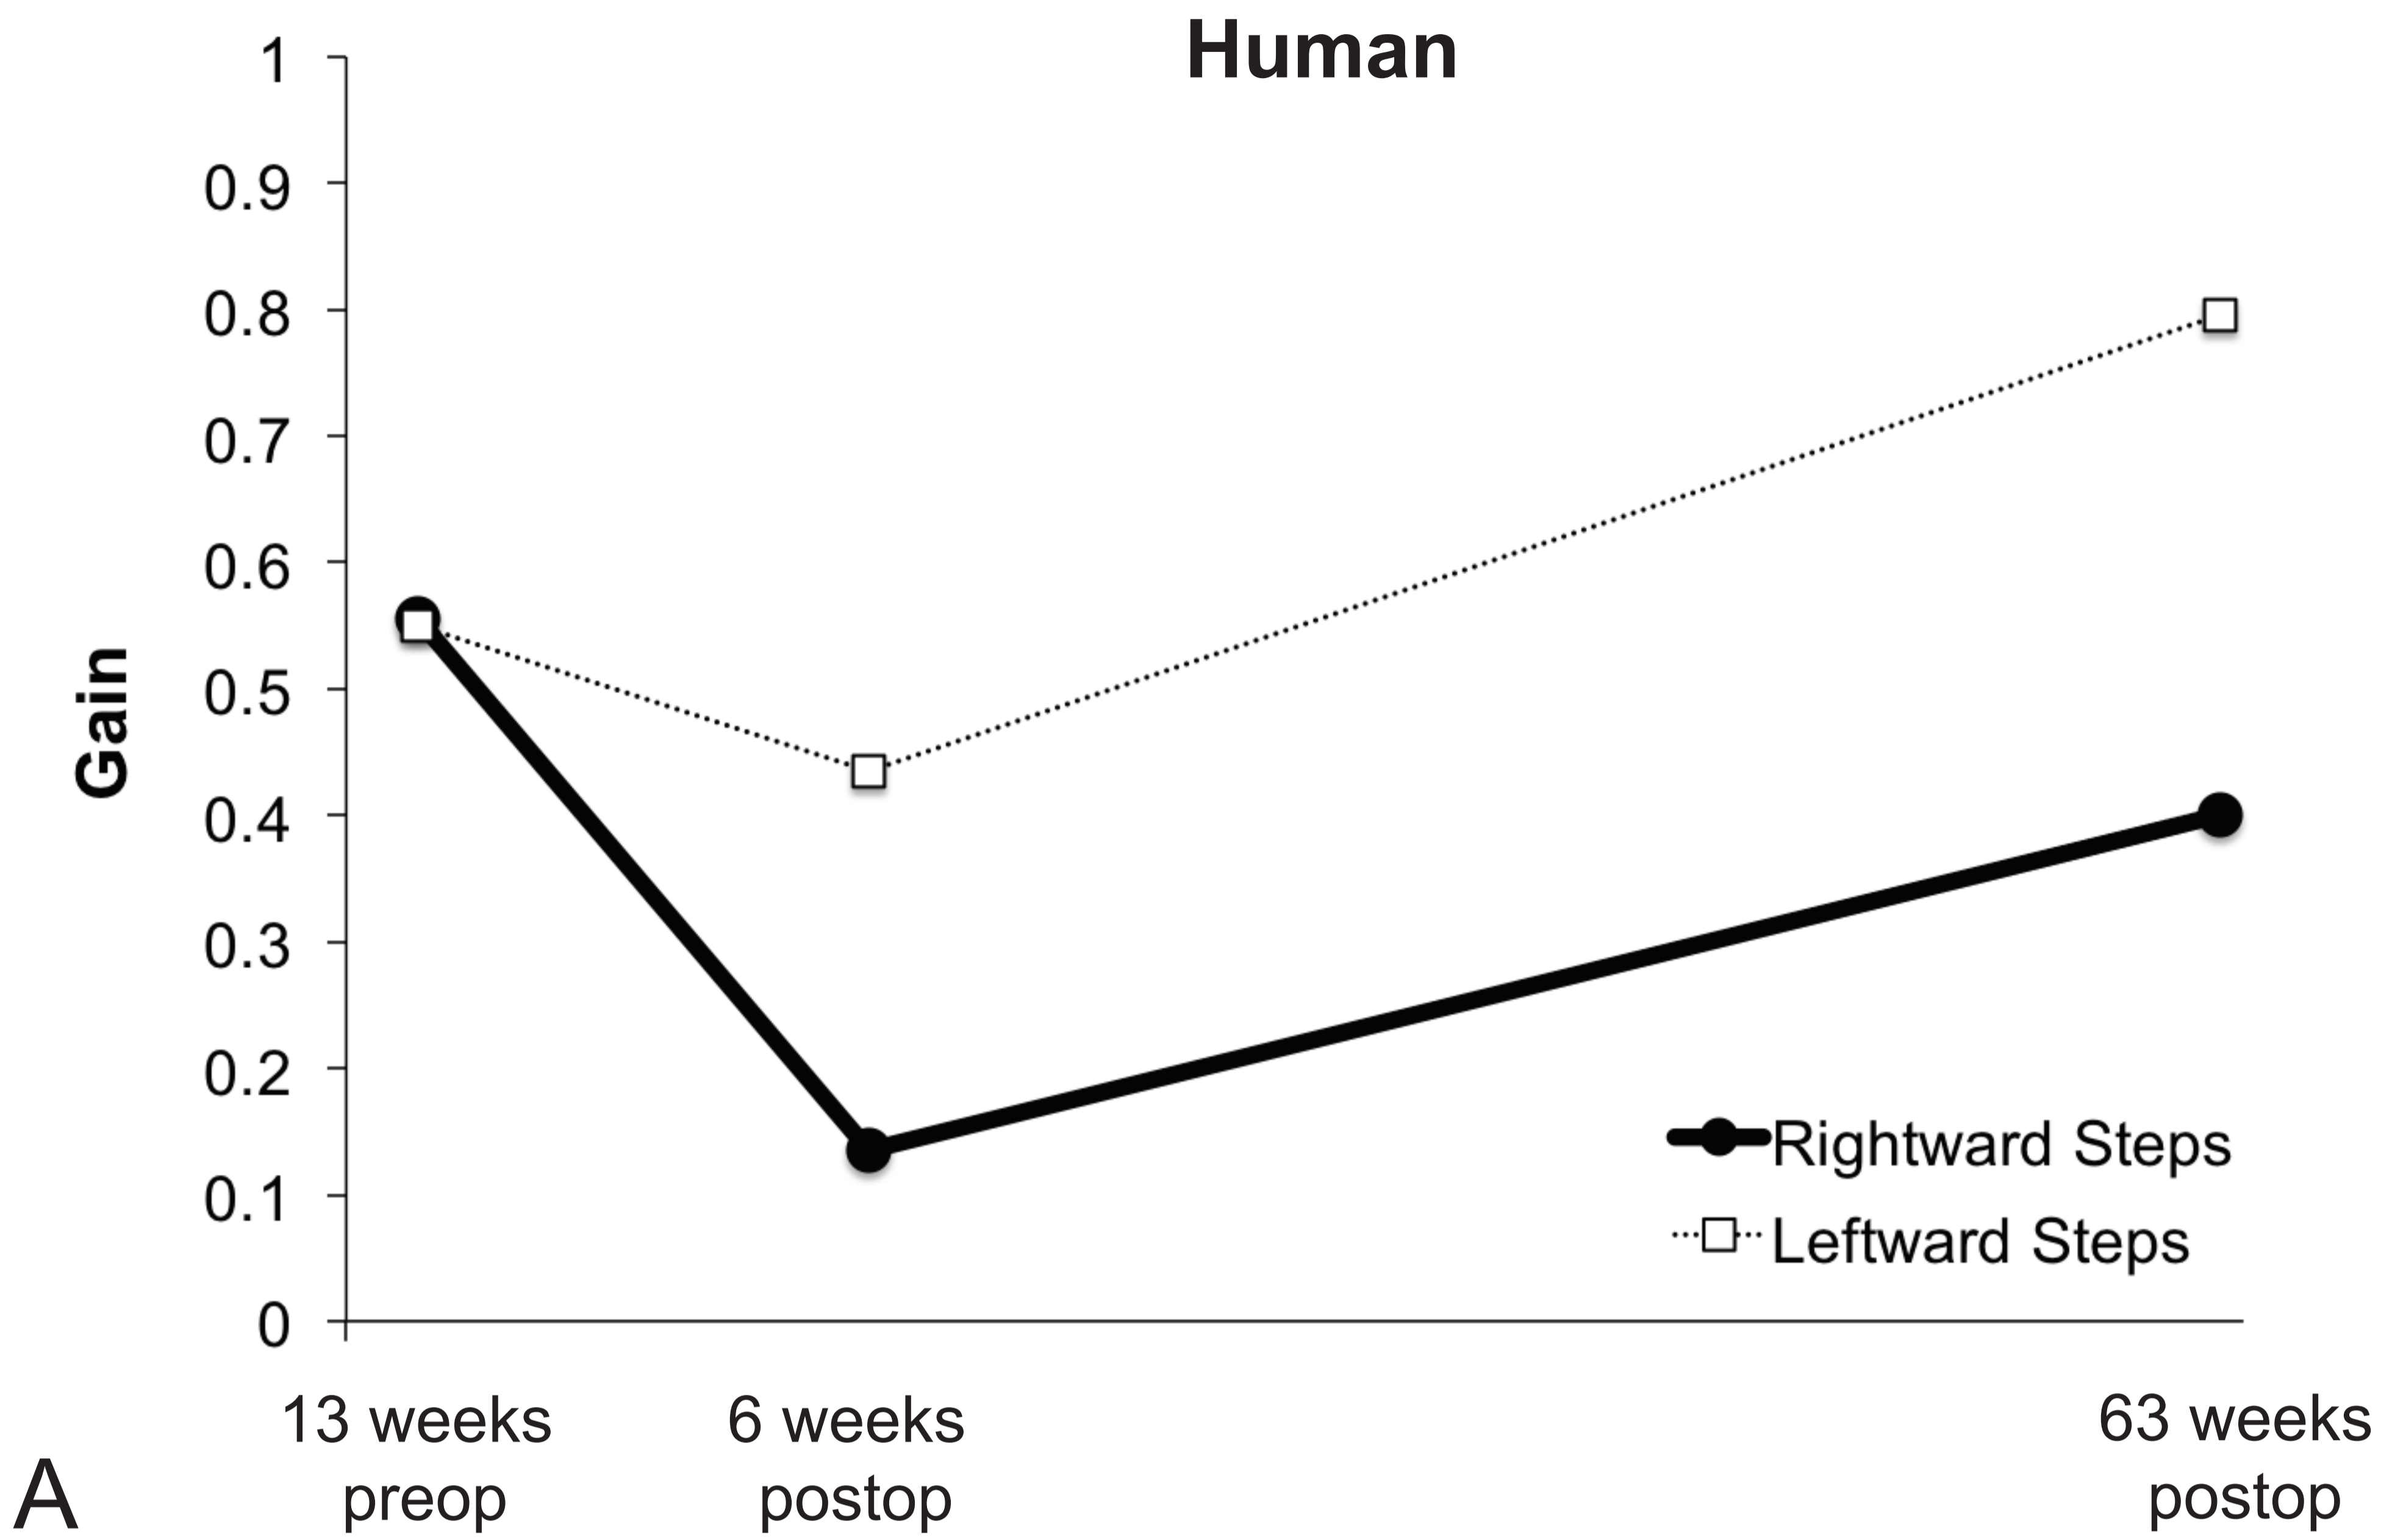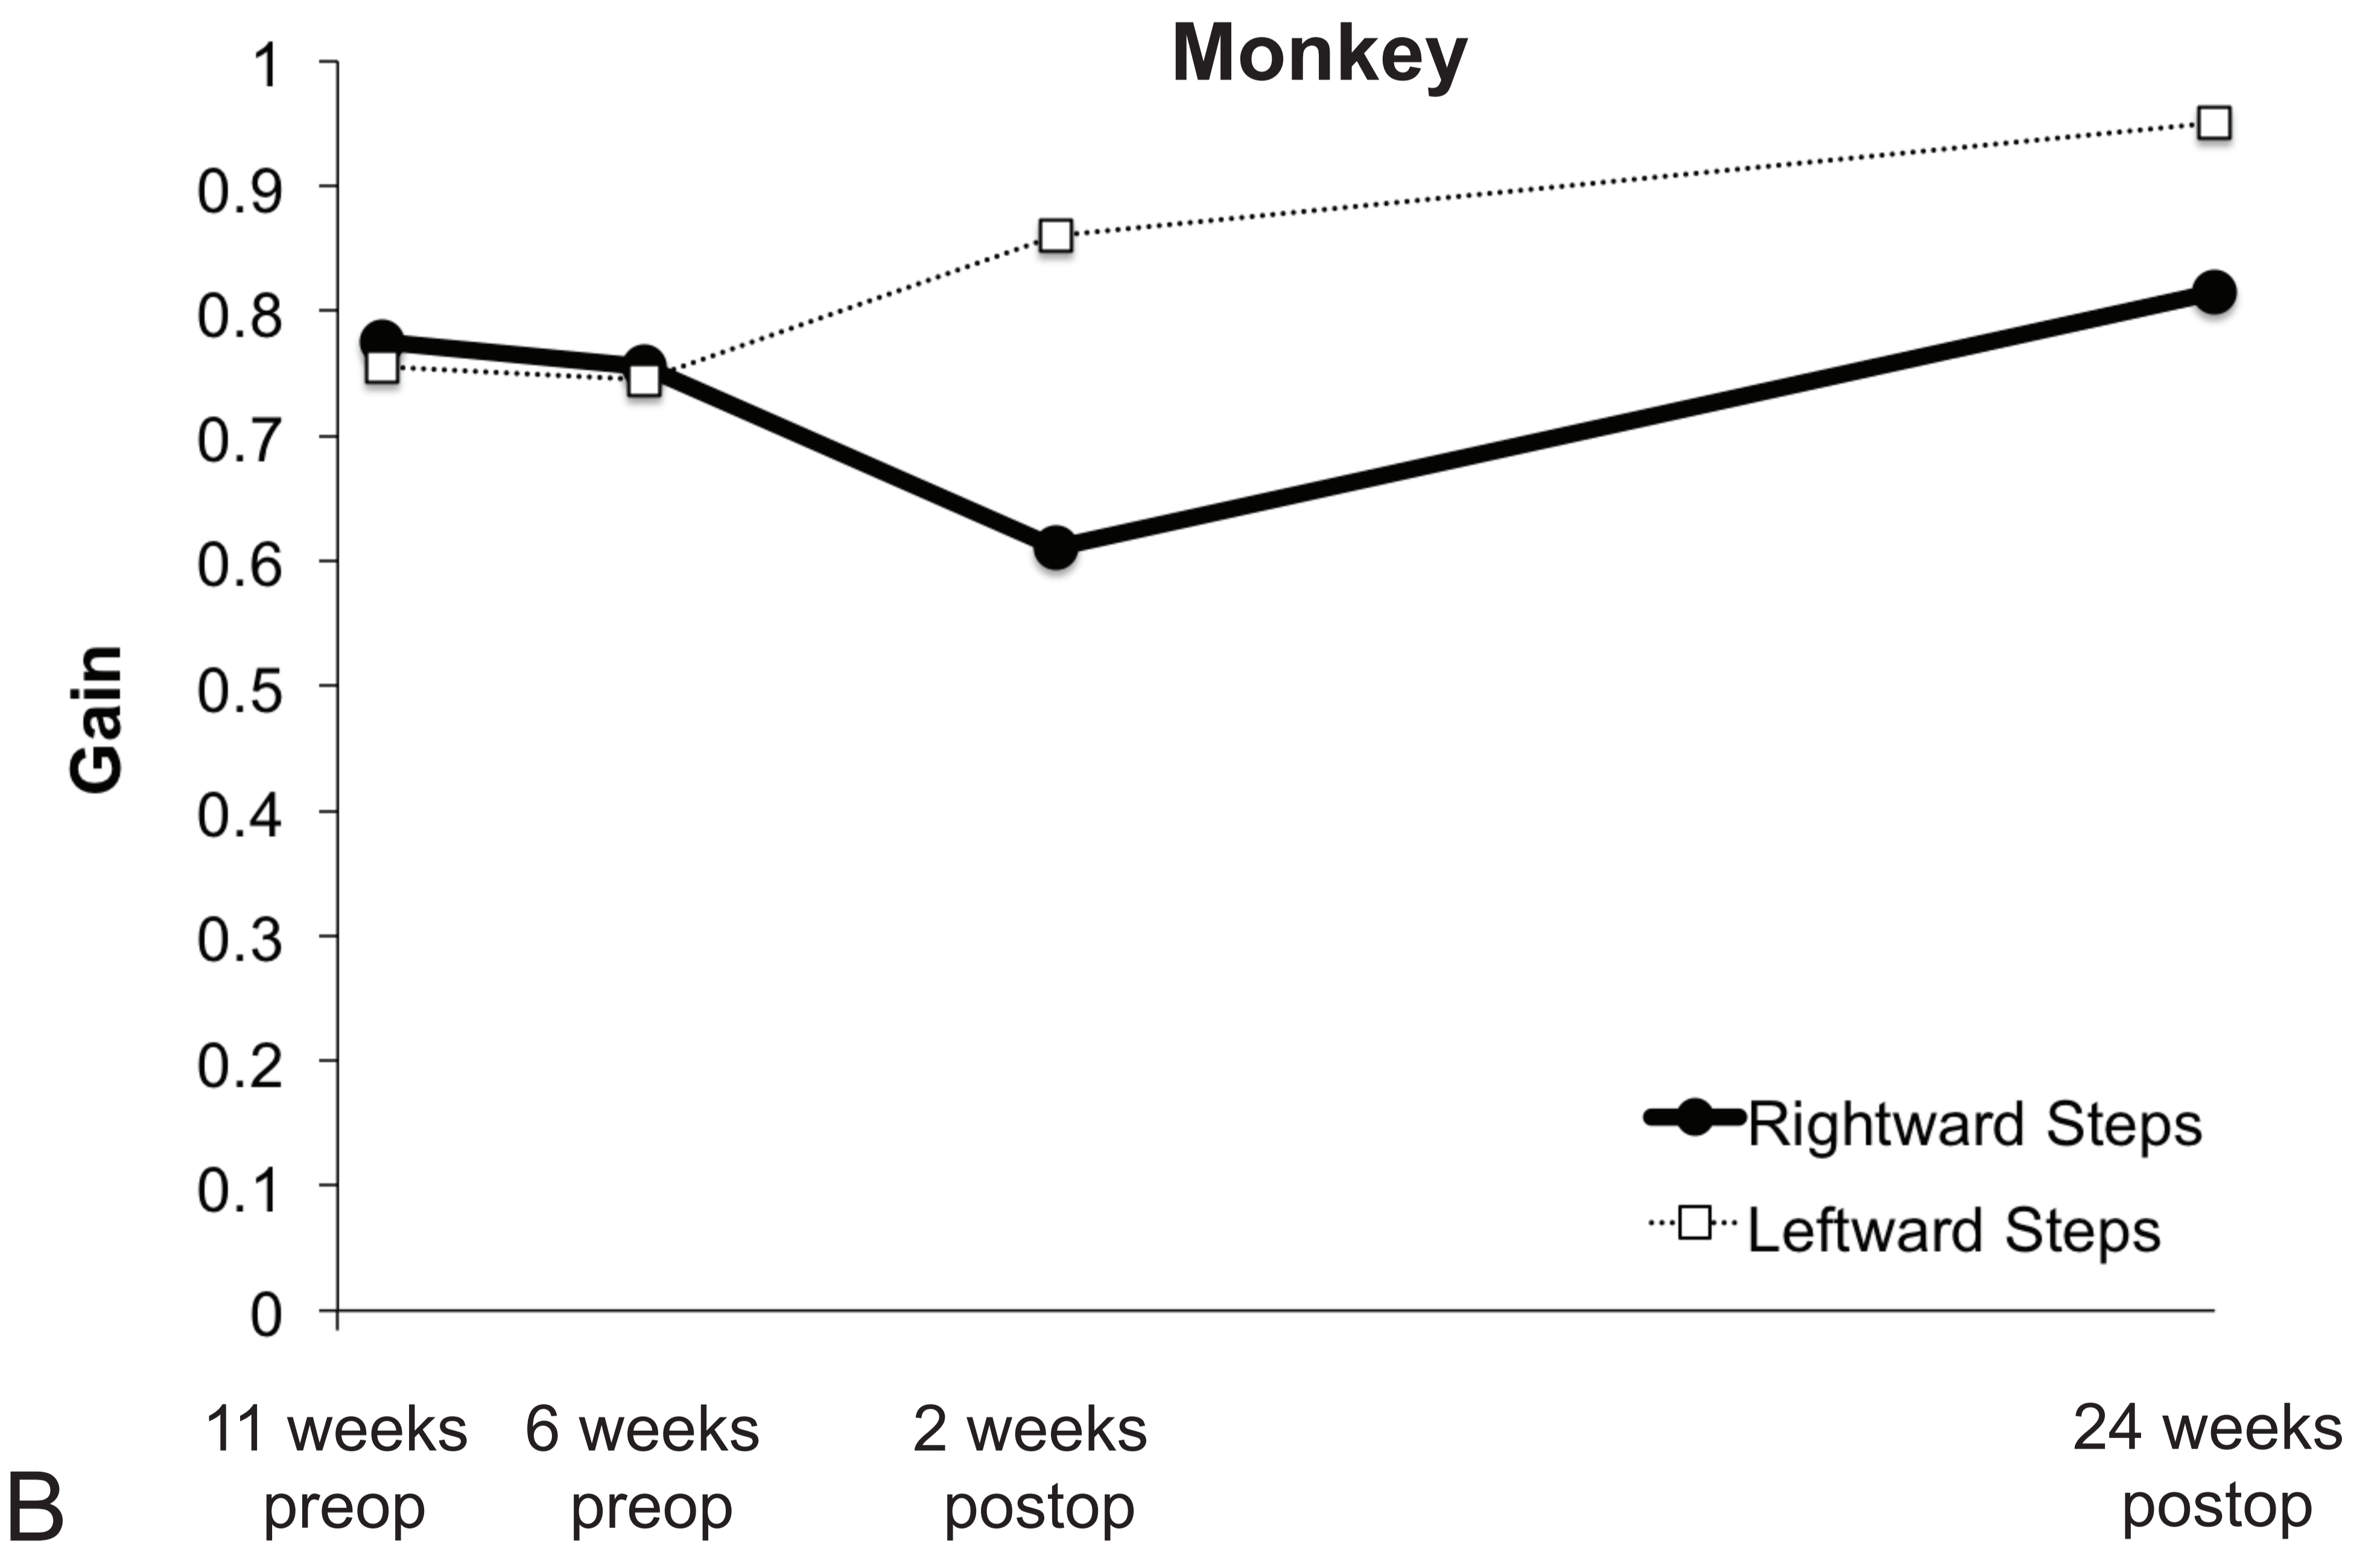

**Human**

|                                      | 13 weeks preop | 6 weeks postop | 87 weeks postop |
|--------------------------------------|----------------|----------------|-----------------|
| <b>Right delta peak SPV</b>          | 20             | 1              | 4               |
| <b>Left delta peak SPV</b>           | 34             | 42             | 24              |
| <b>Unilateral weakness %</b>         | 26             | 95             | 71              |
| <b>Unilateral weakness direction</b> | Right          | Right          | Right           |

**C**
