# Supplementary material
Source: PubMed Central journal article supplement (PMC4369342)

# Supp Figure 1

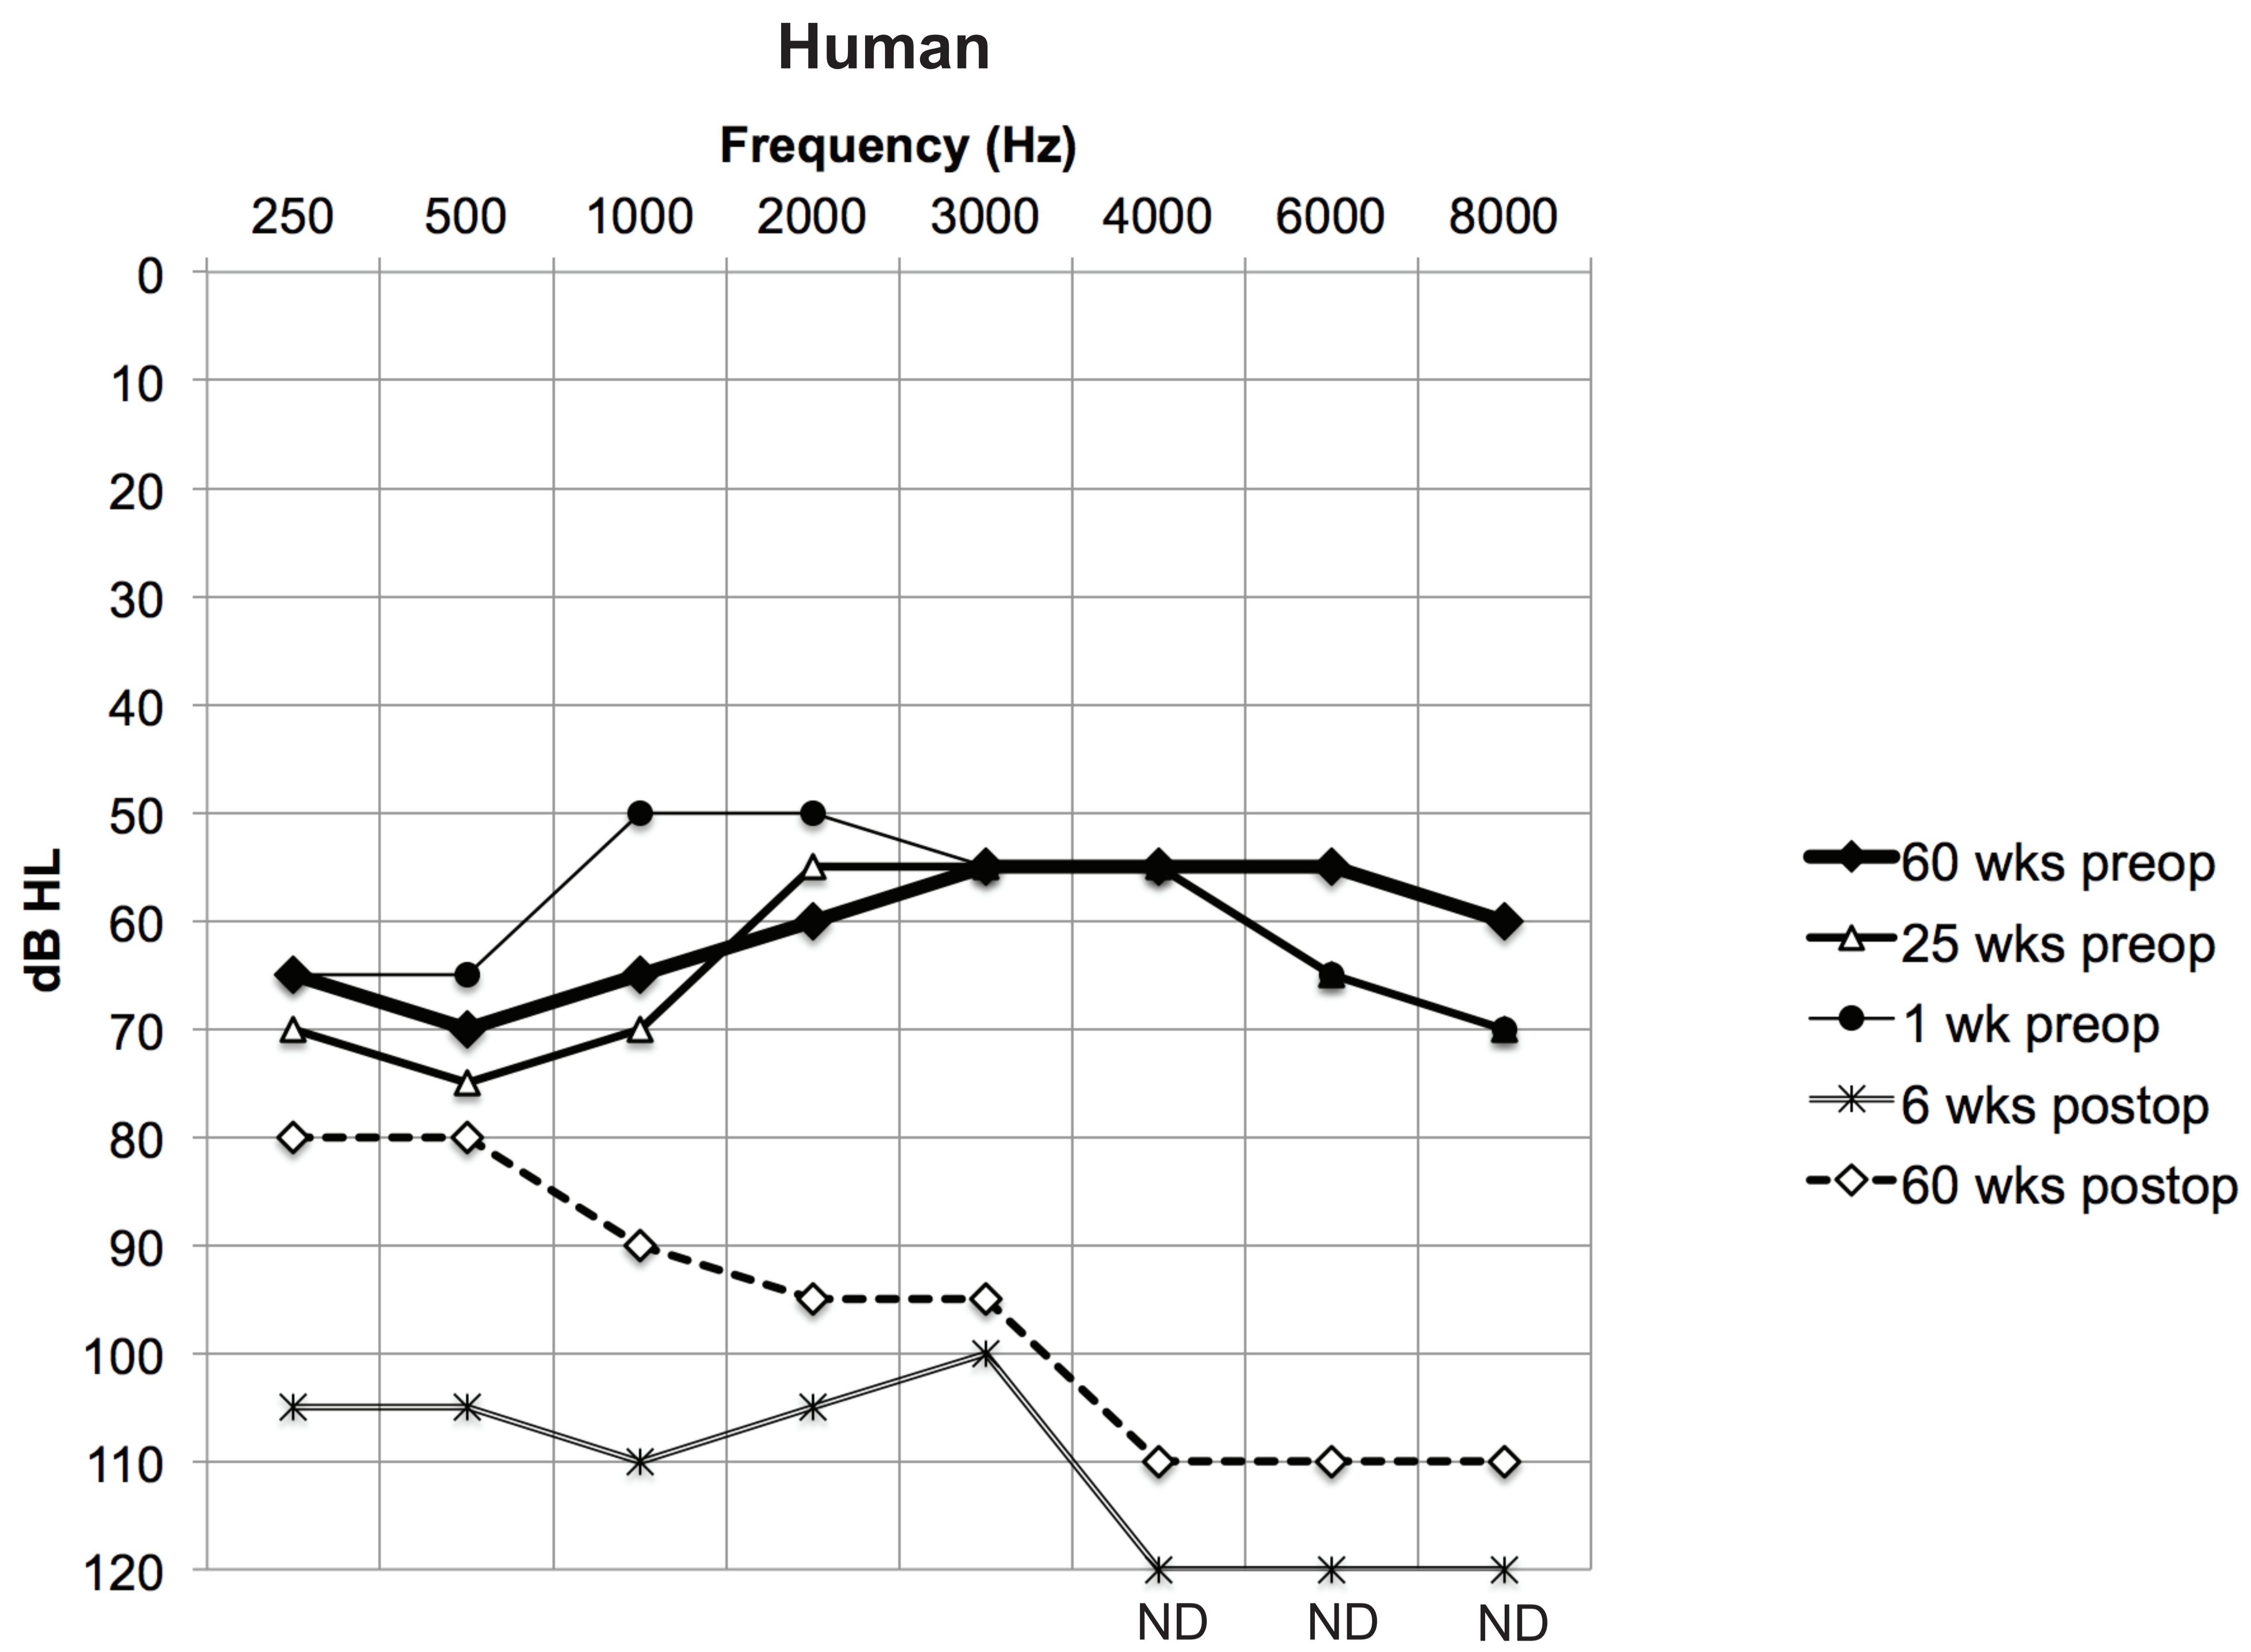

| Time         | Word Recognition |           |
|--------------|------------------|-----------|
| 60 wks preop | 44%              | at 85 dB  |
| 25 wks preop | 40%              | at 85 dB  |
| 1 wk preop   | 40%              | at 85 dB  |
| 60 wk postop | 4%               | at 105 dB |

A

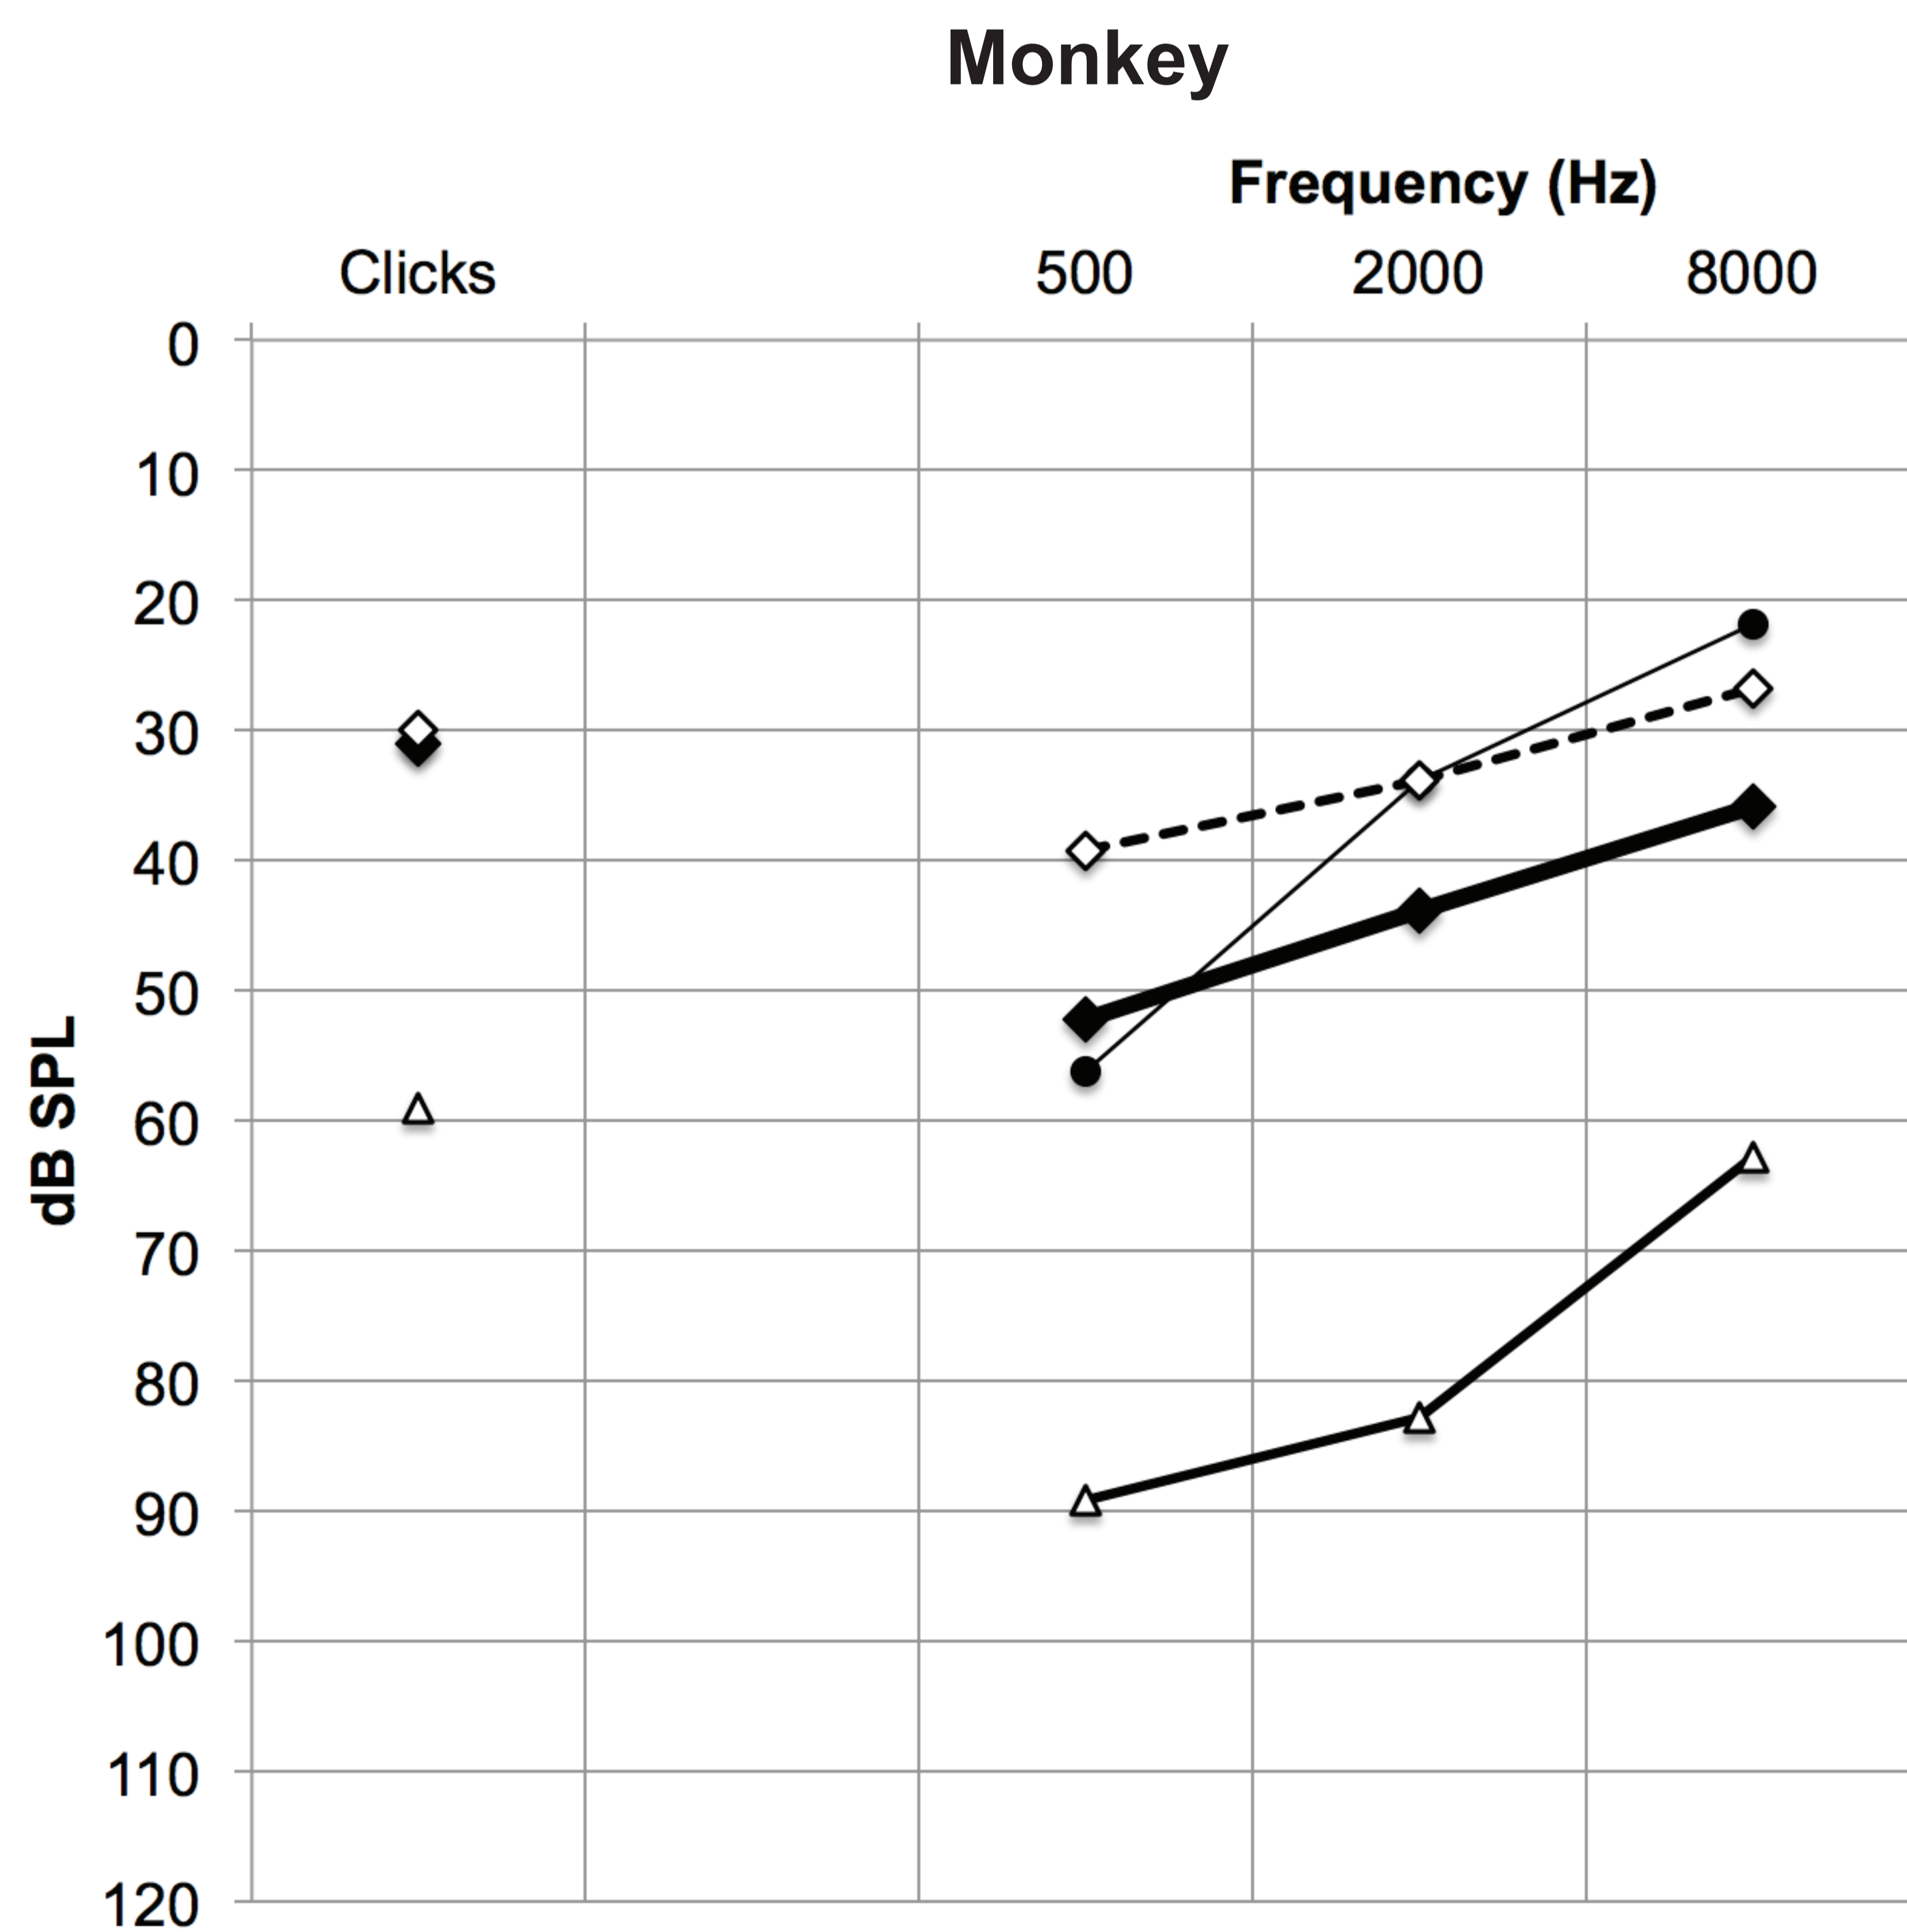

B

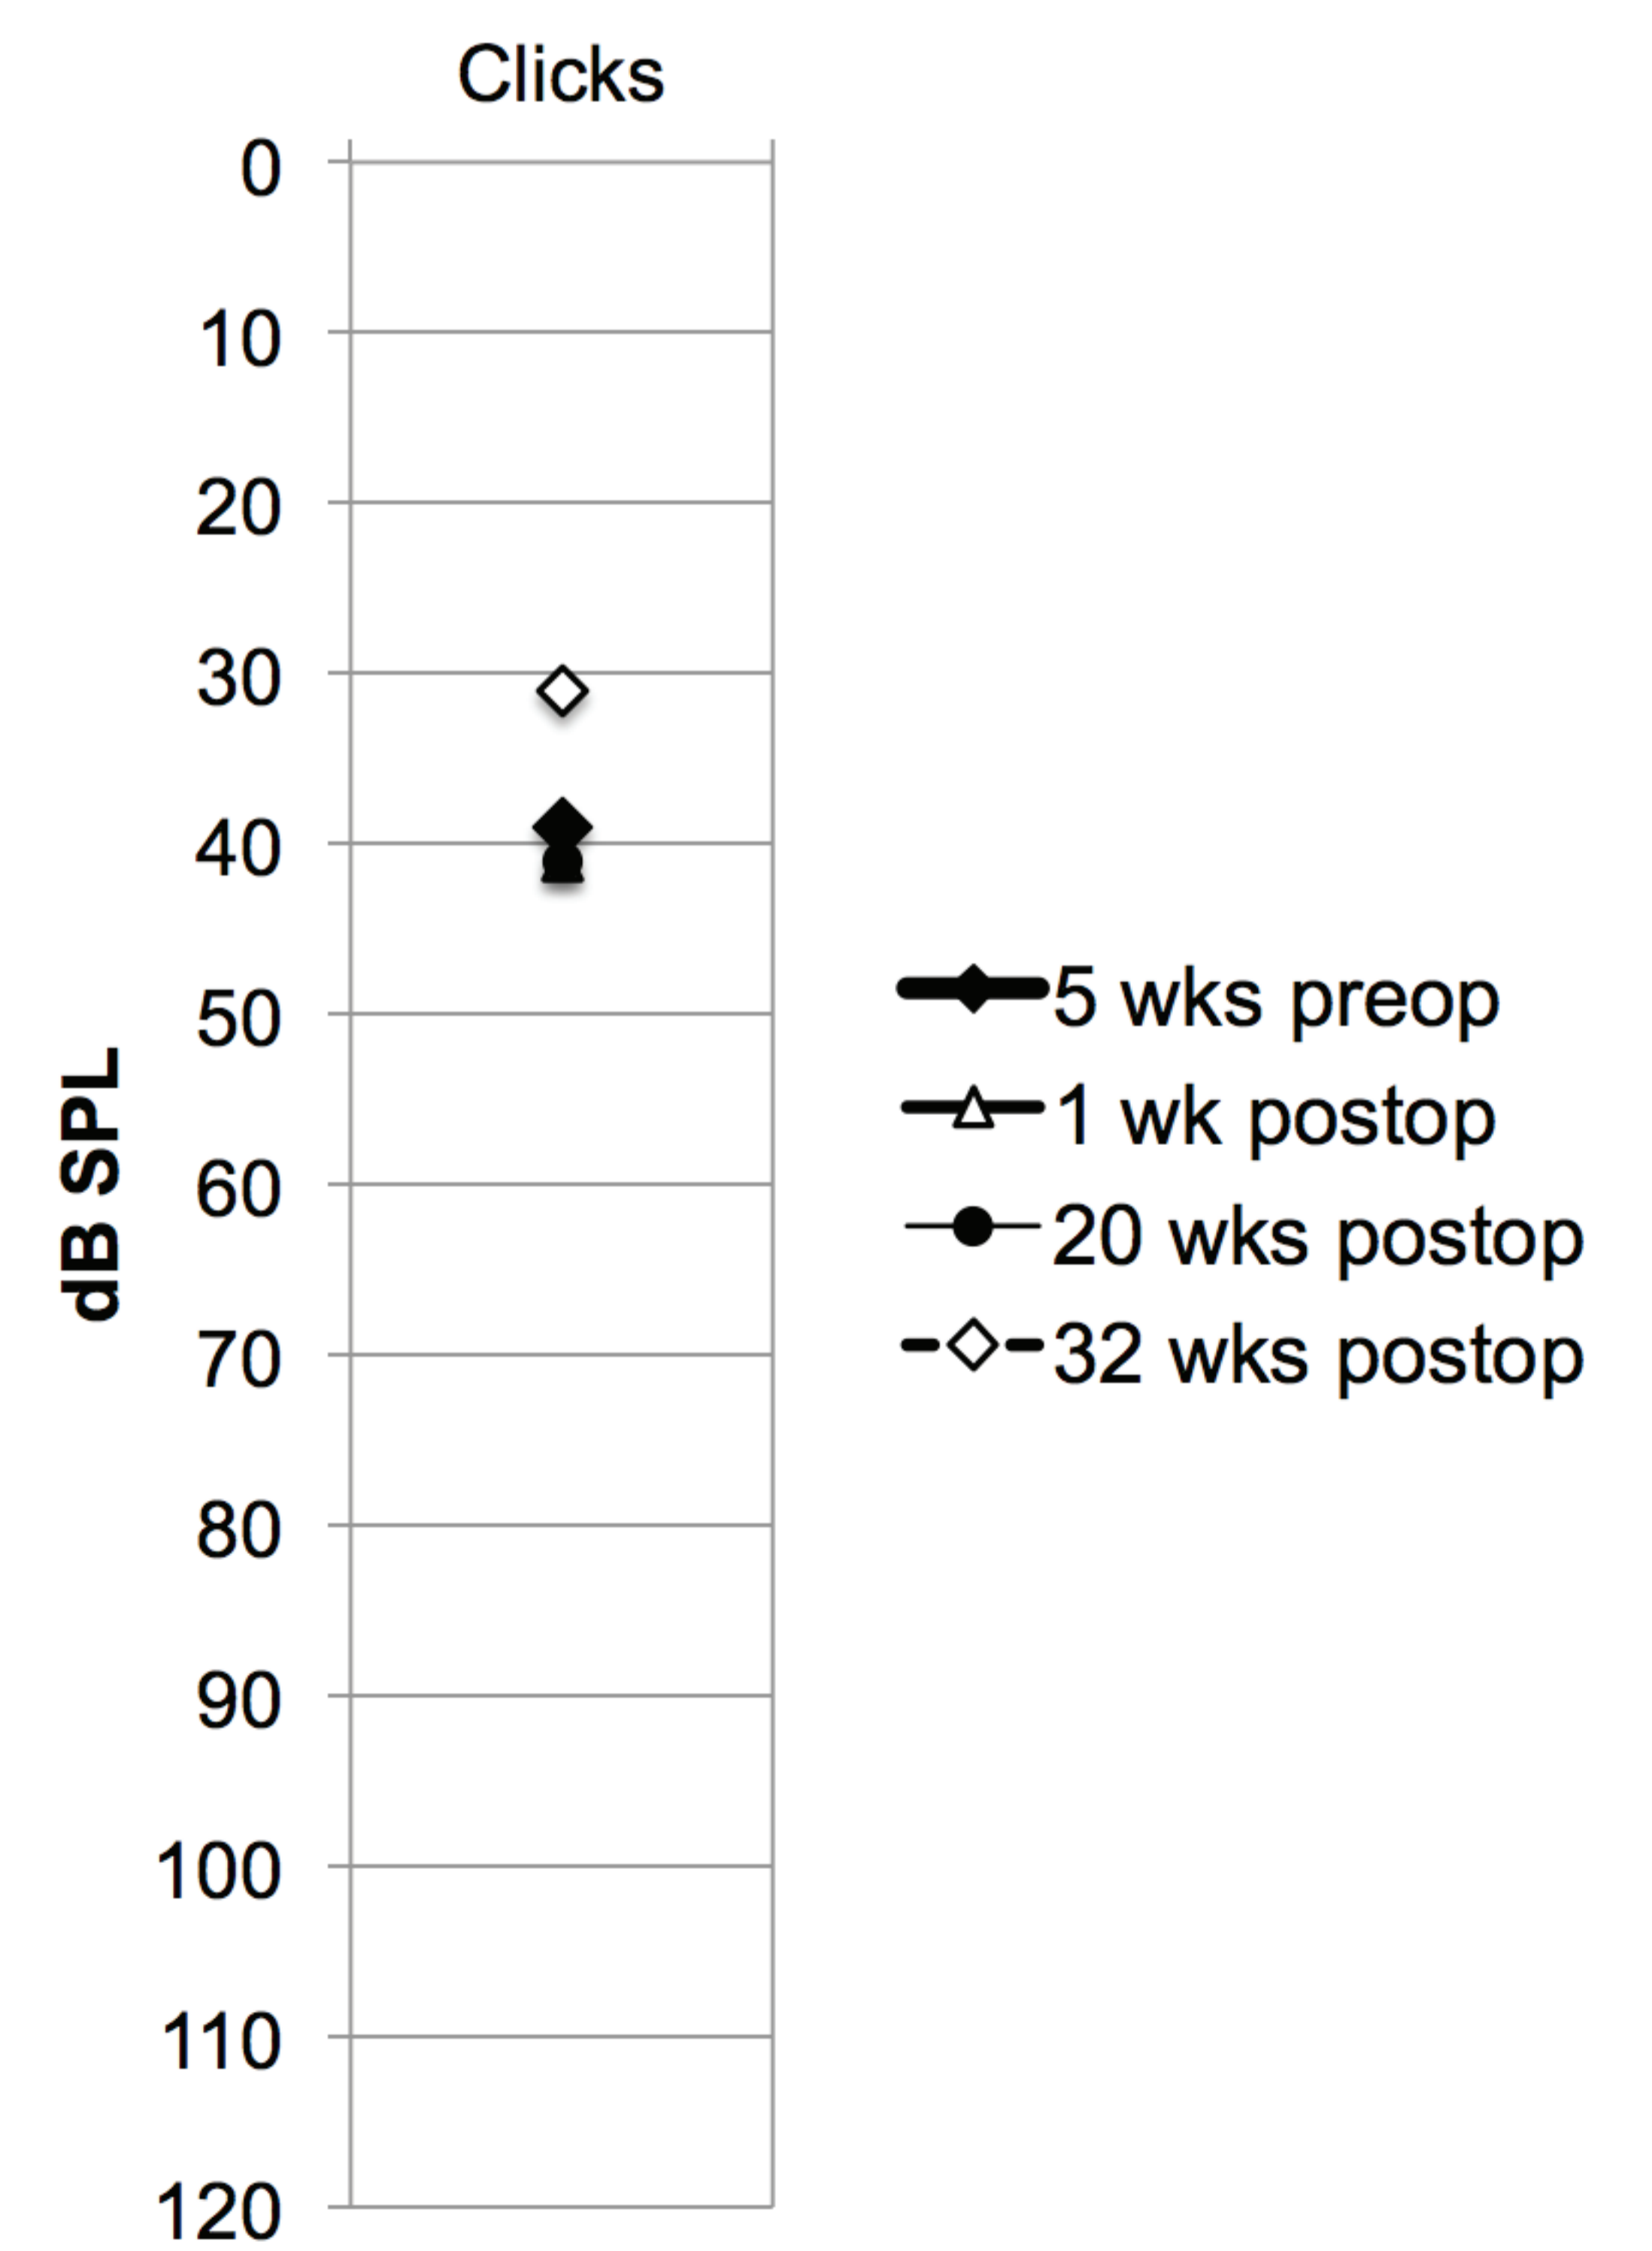

C

Supplement: NIHMS512515-supplement-1.pdf [file NIHMS512515-supplement-1.pdf]

# Supp Figure 3

## Horizontal Eye Movements

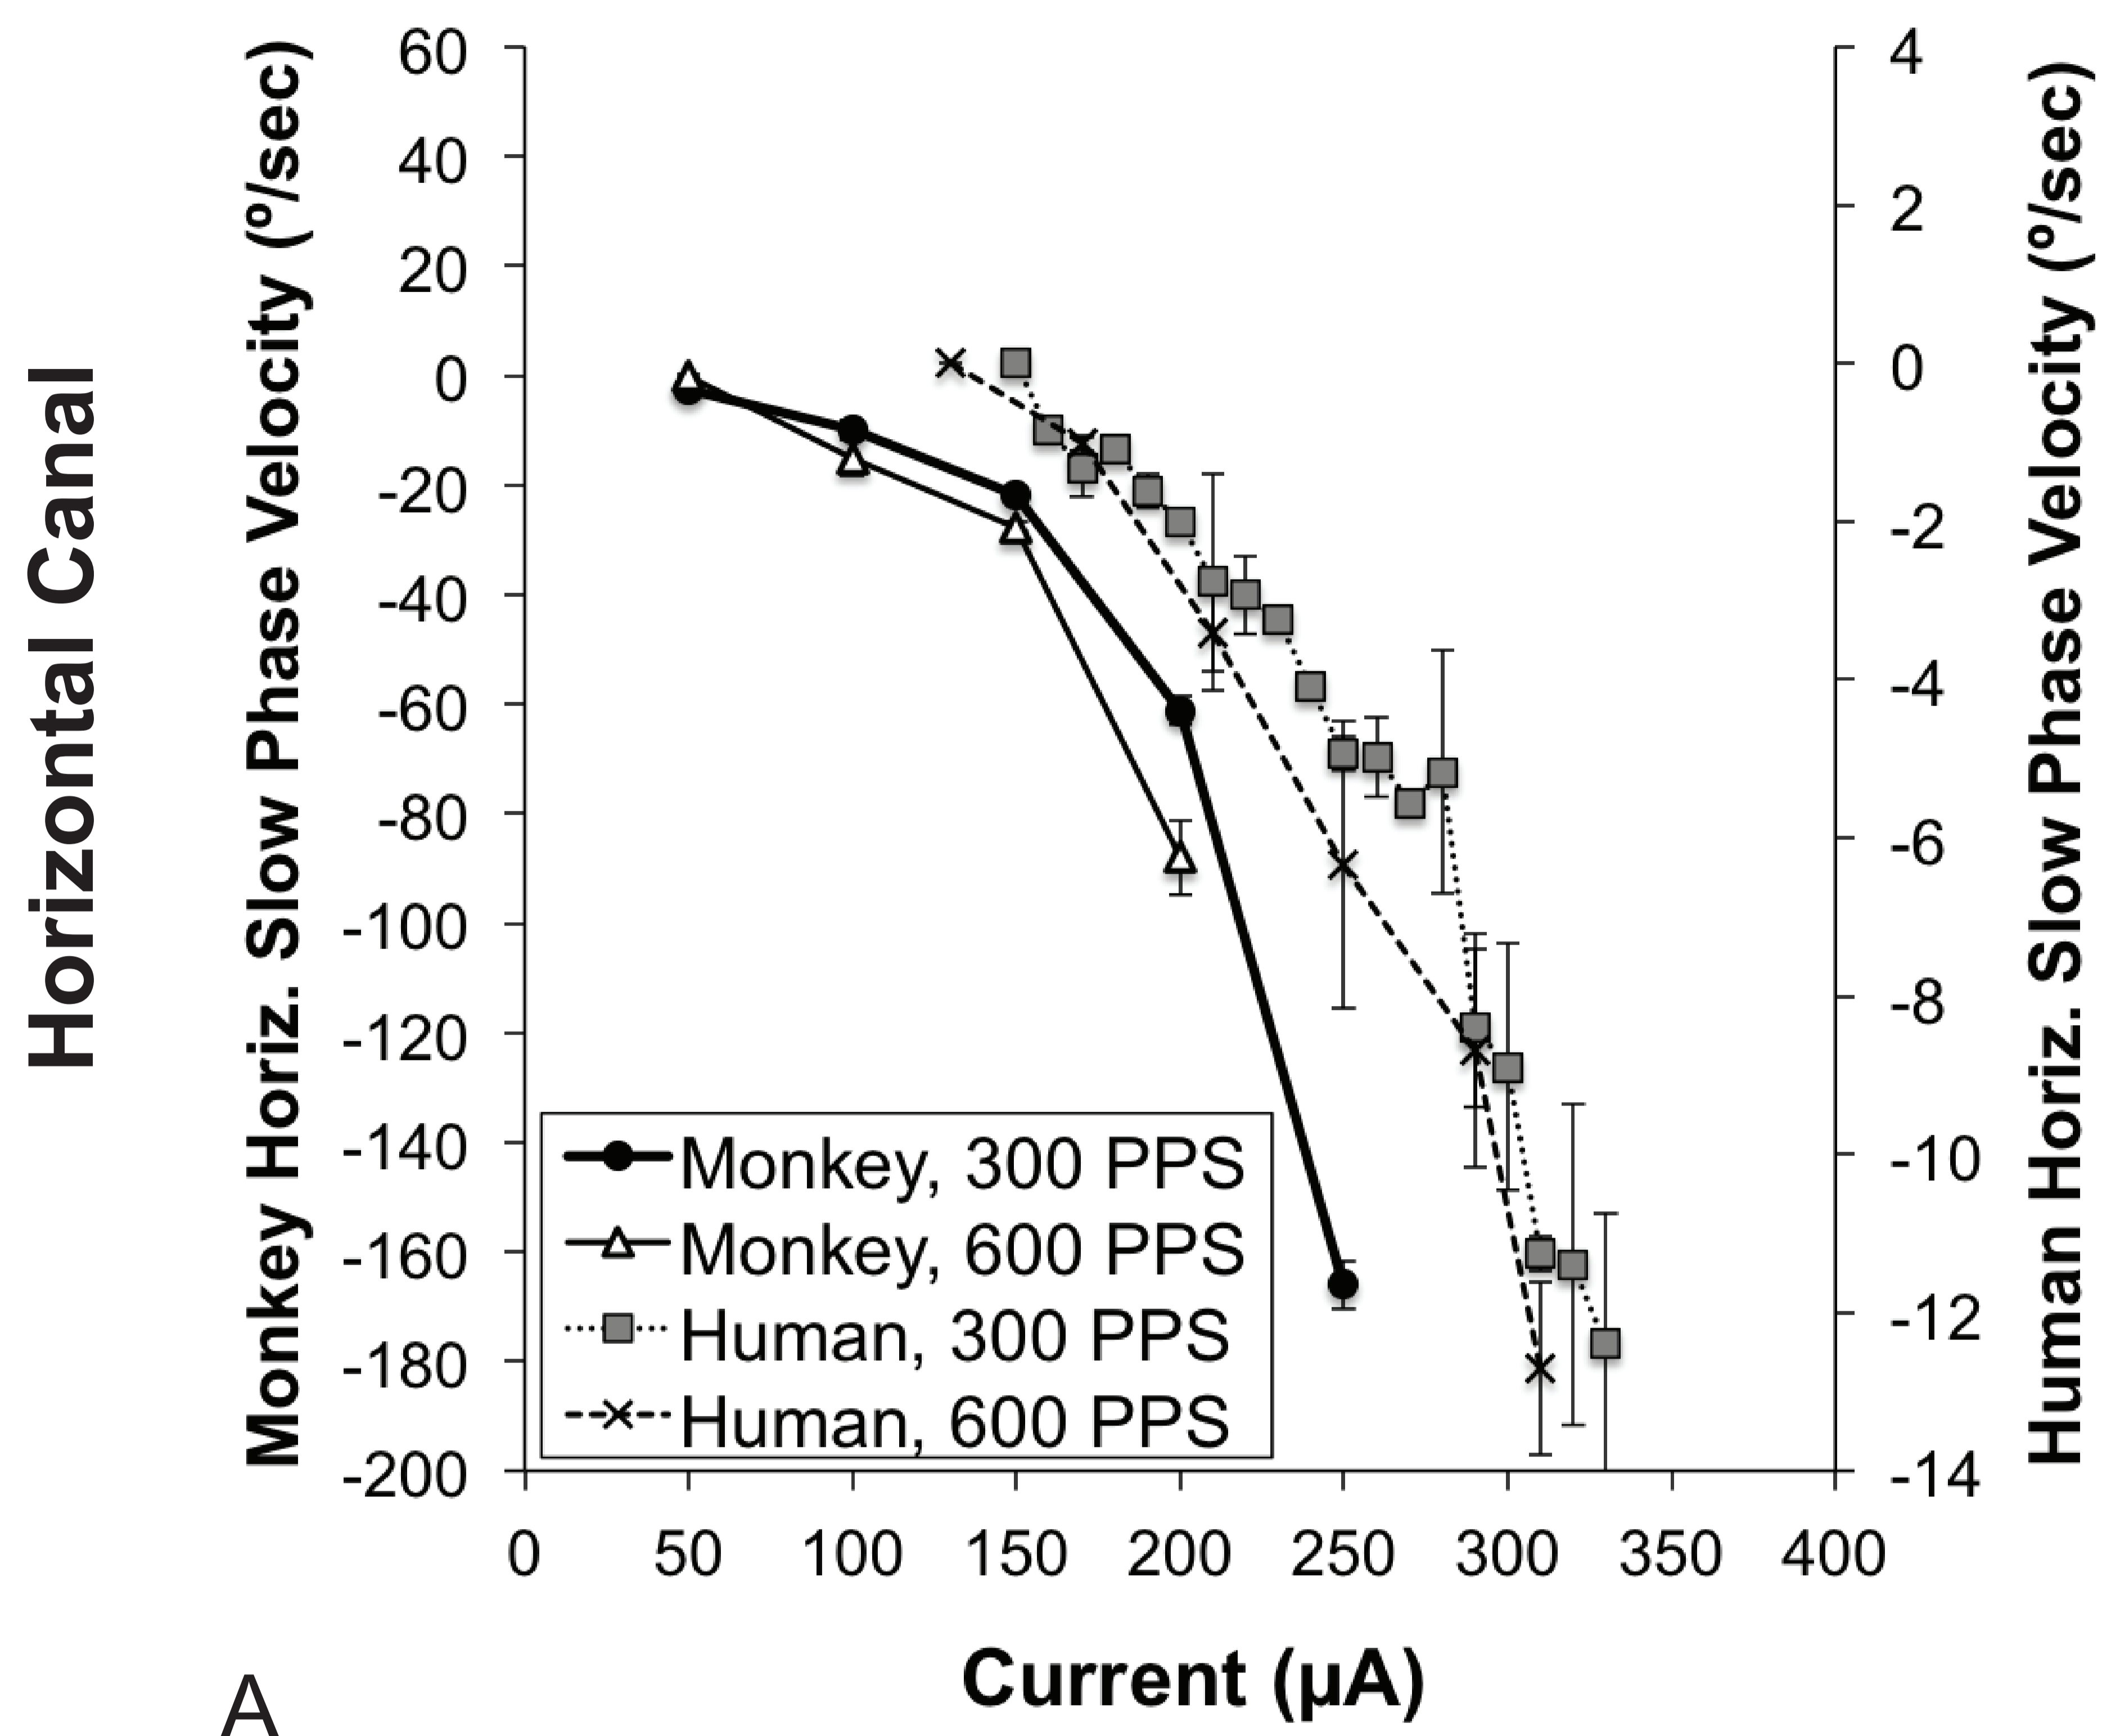

A

## Vertical Eye Movements

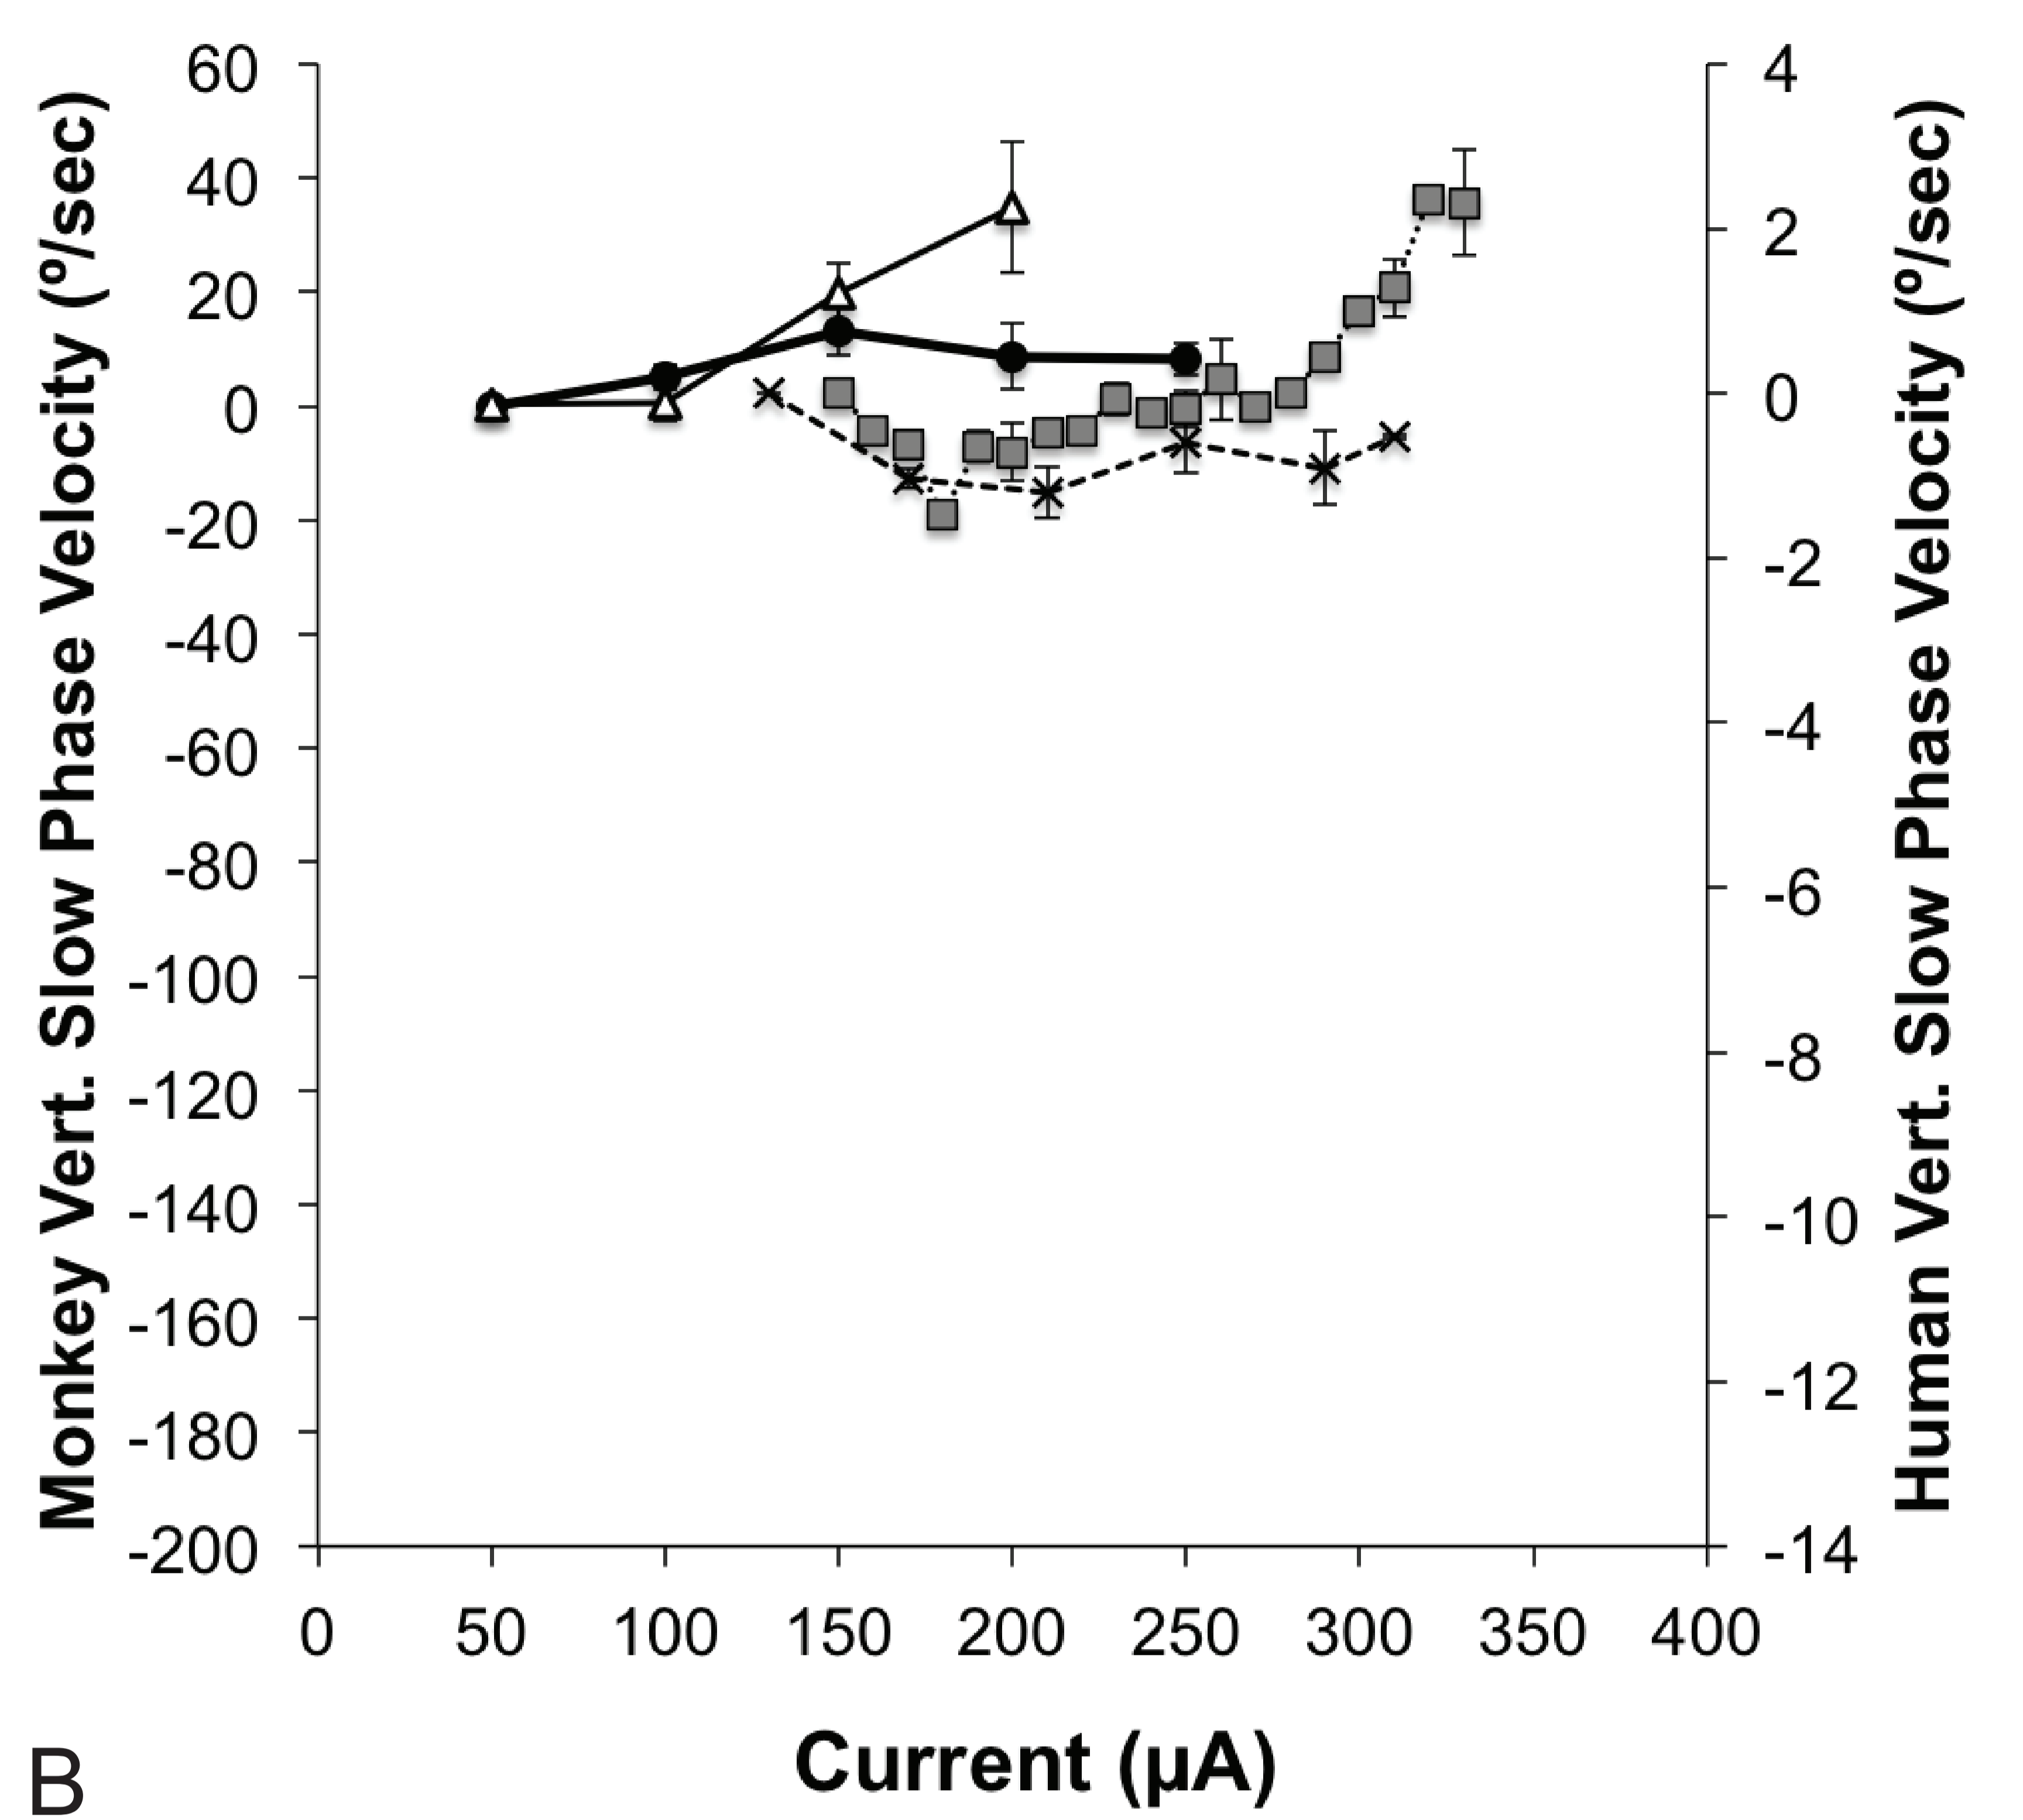

B

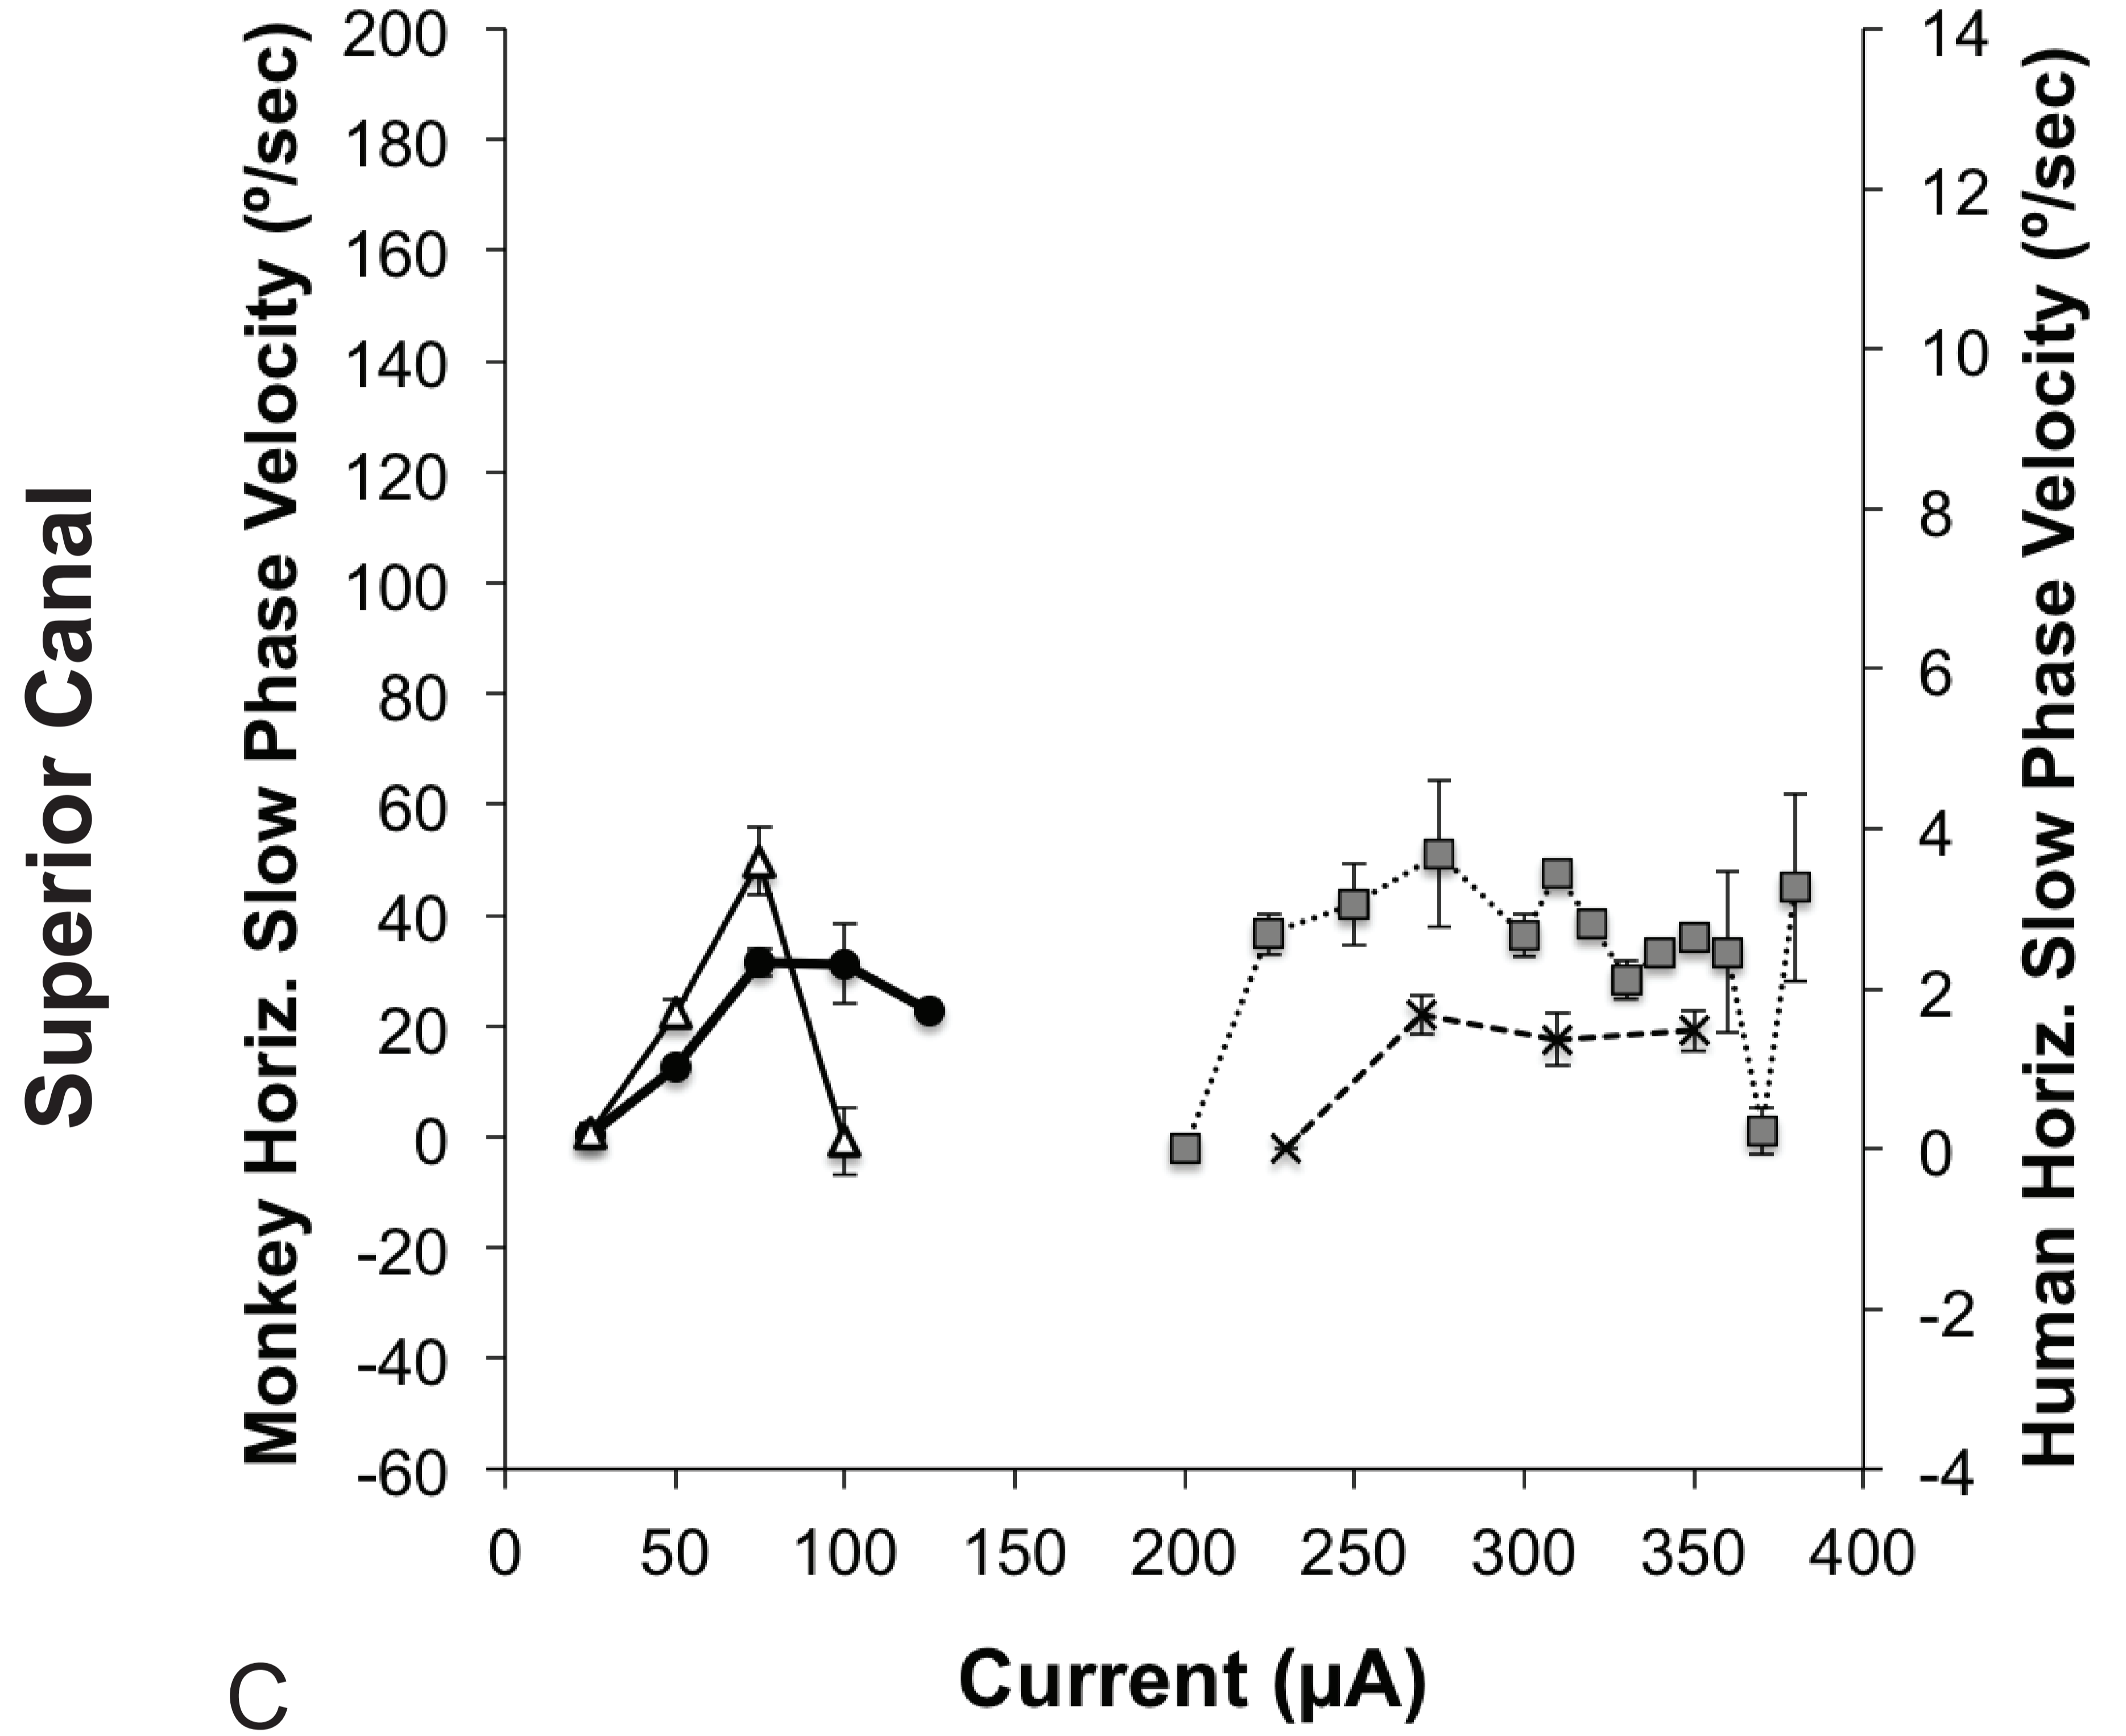

C

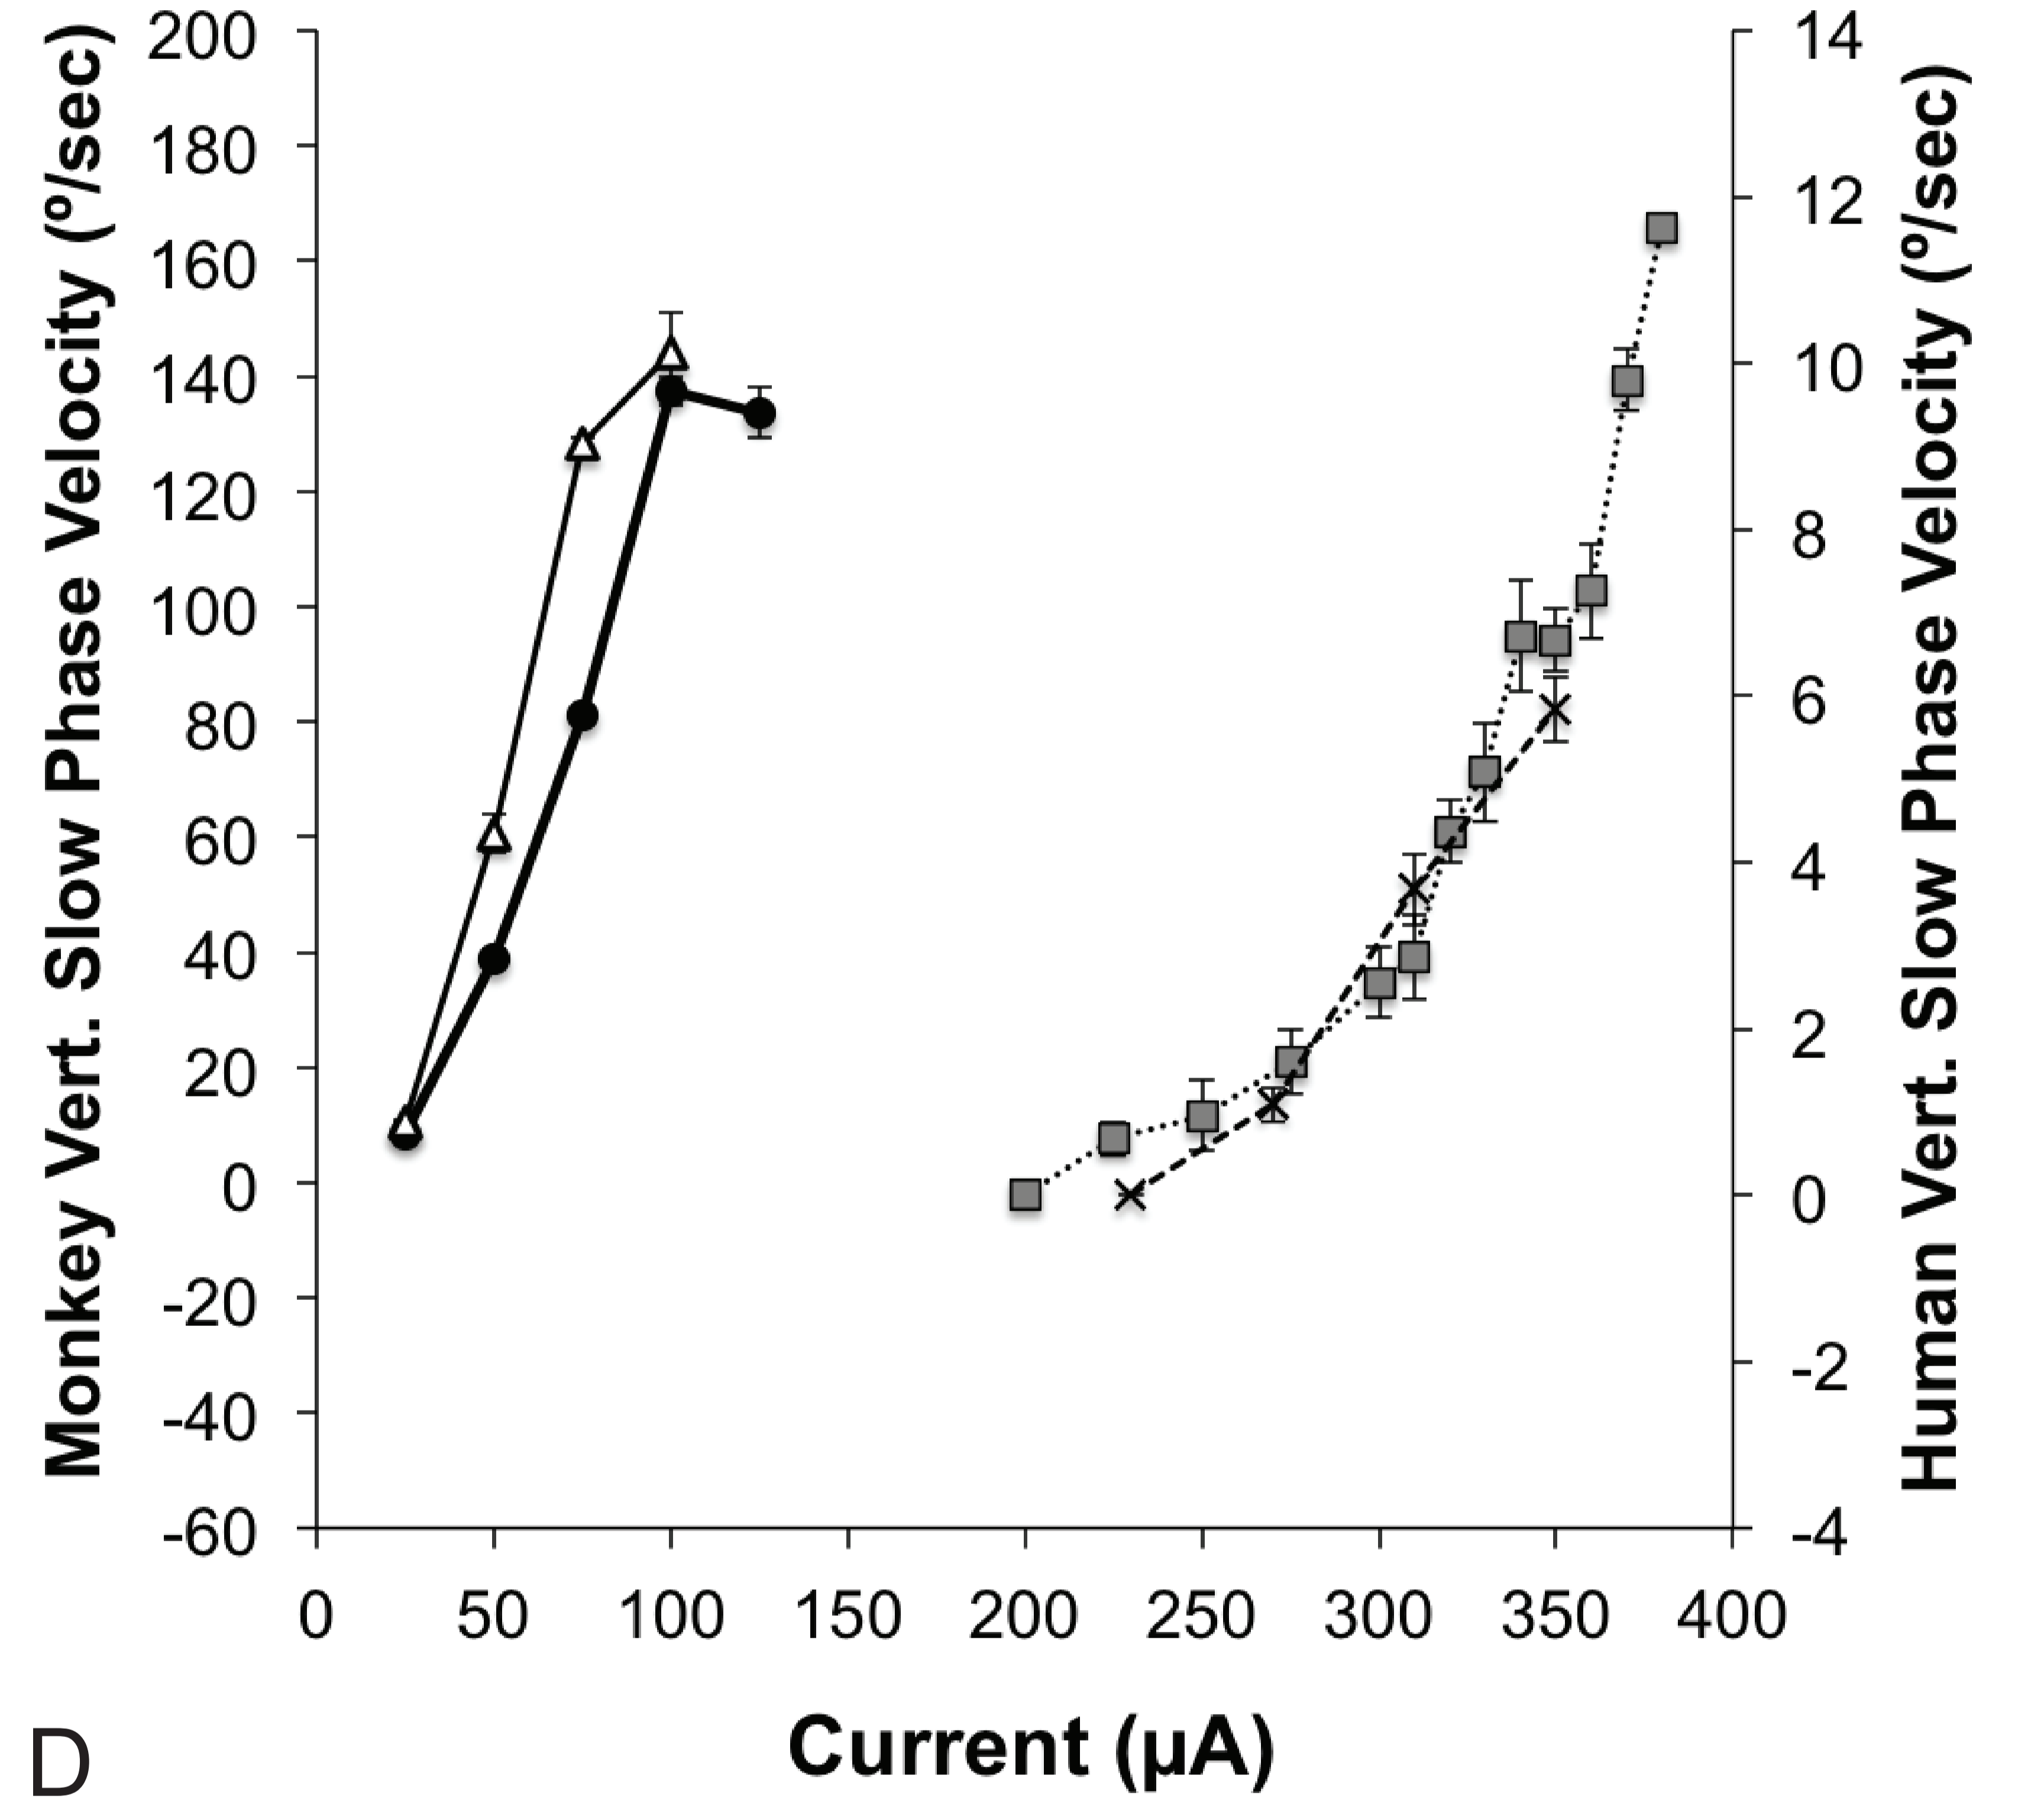

D

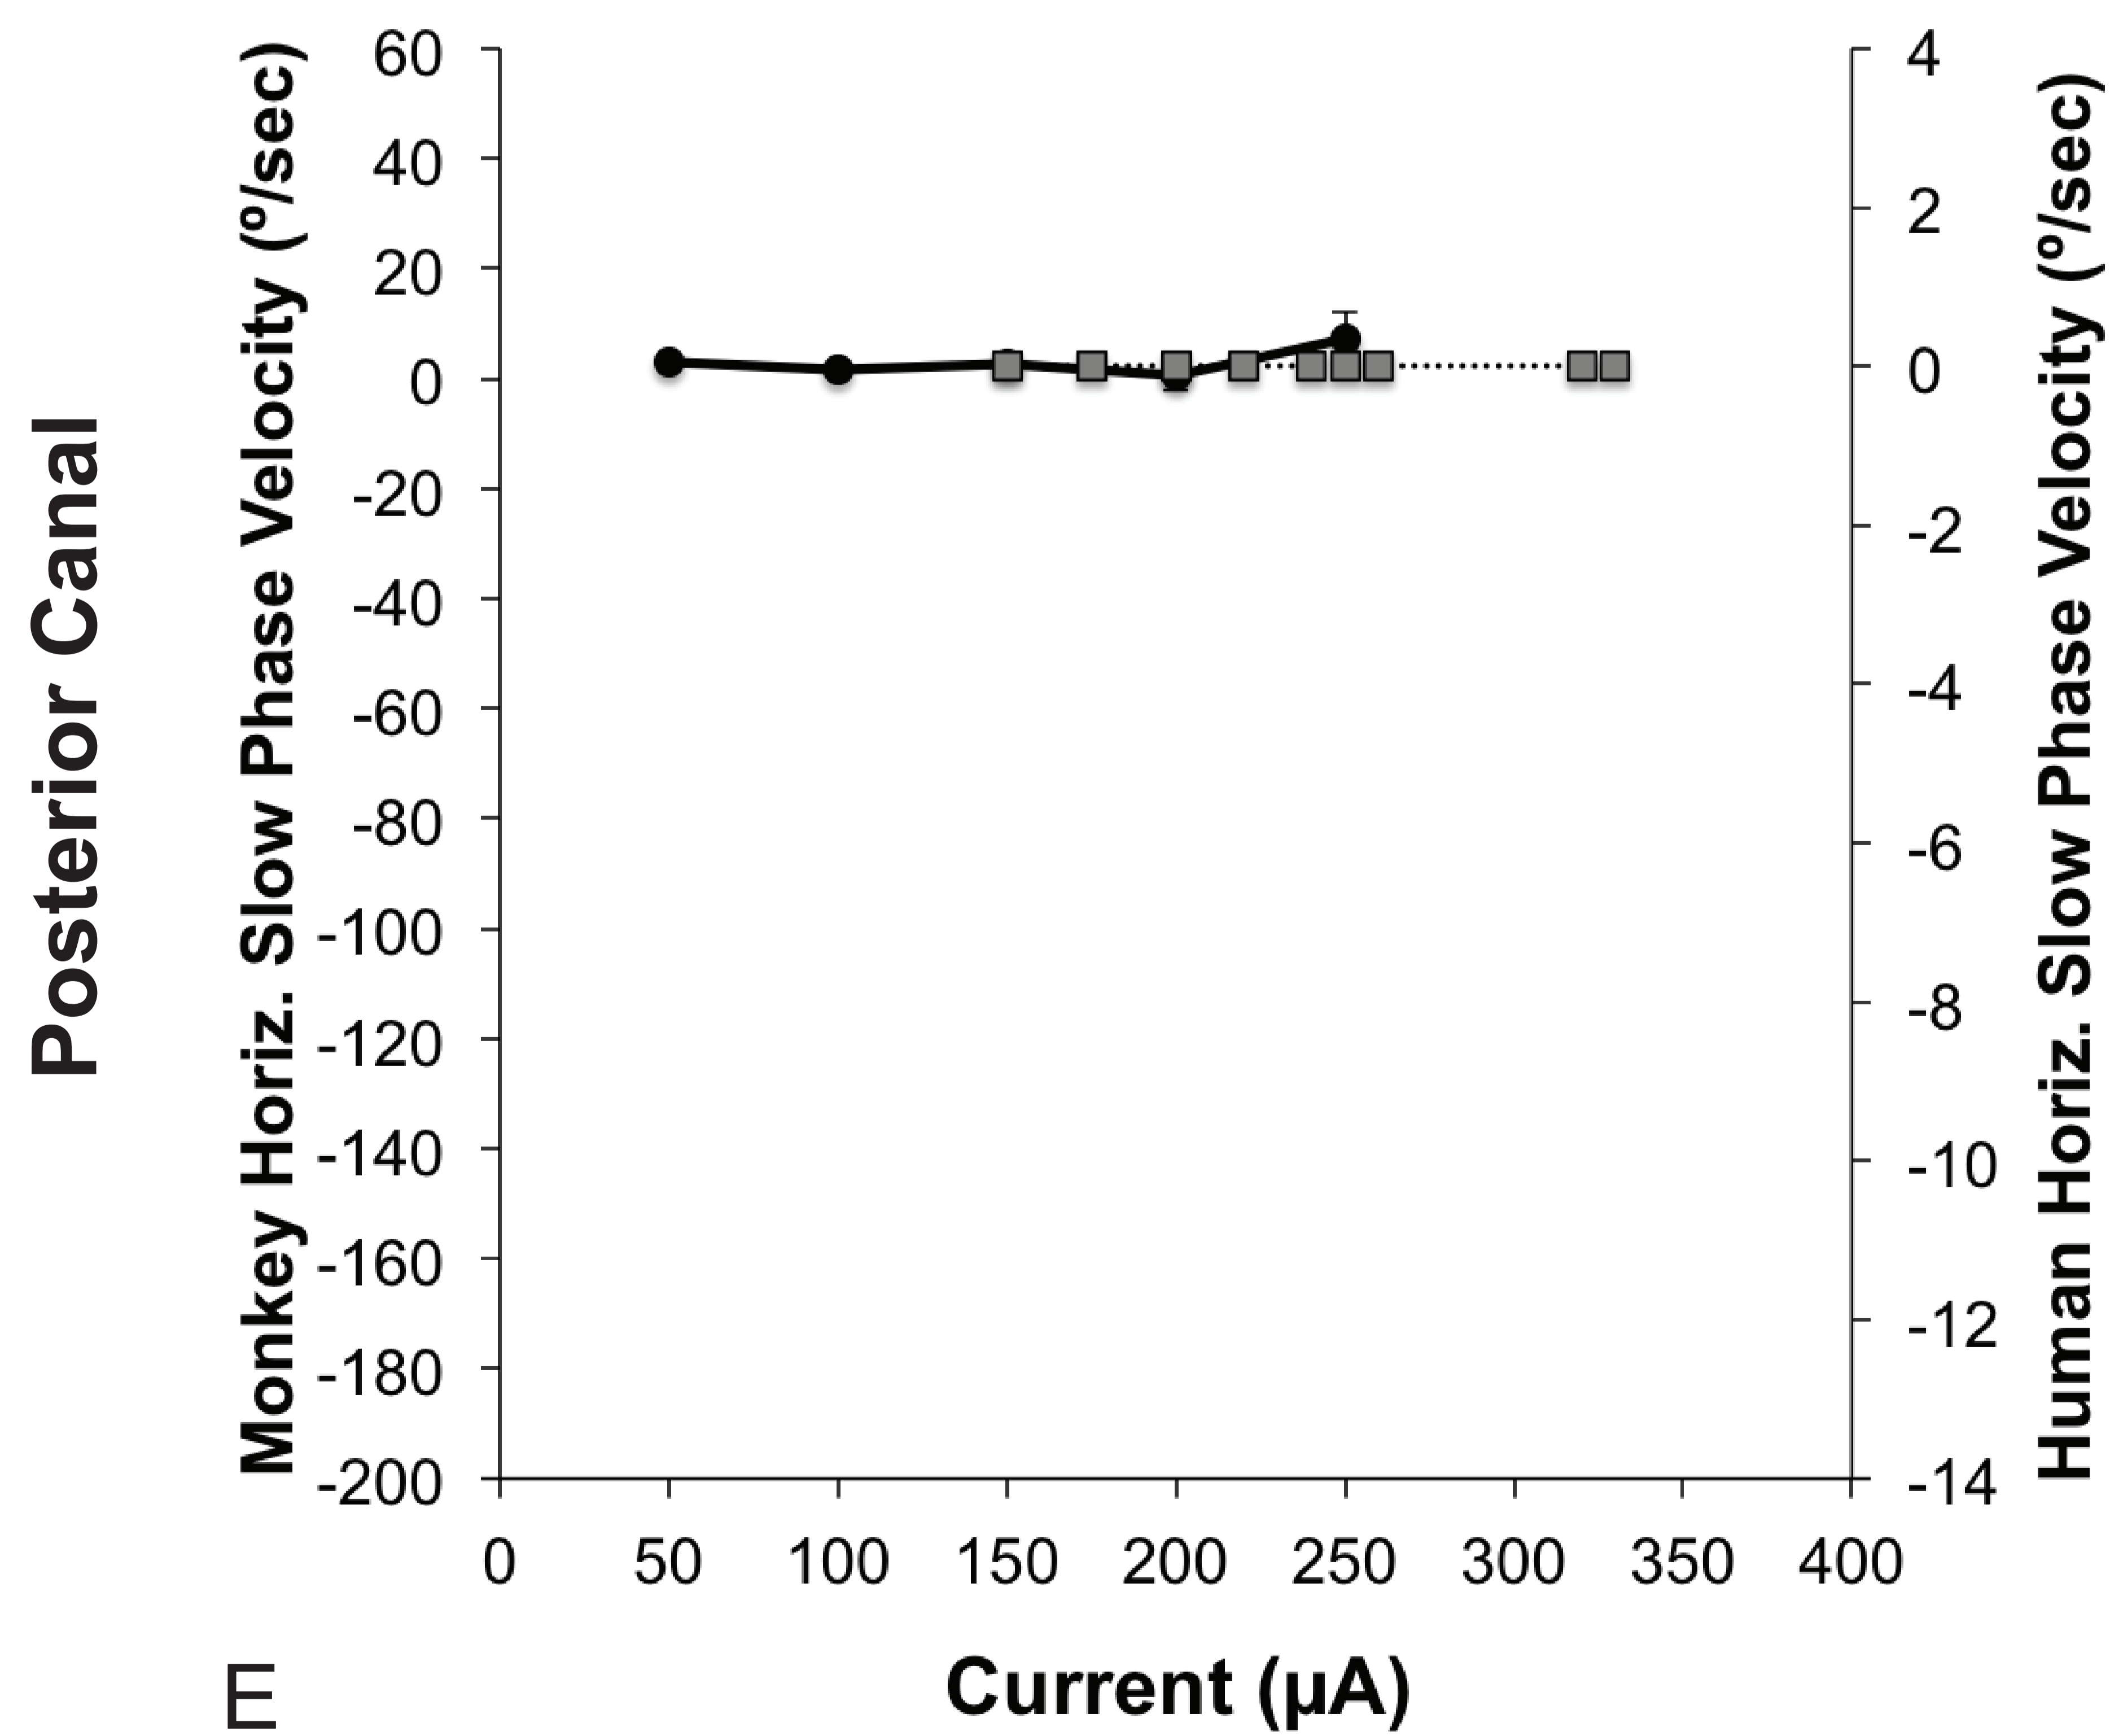

E

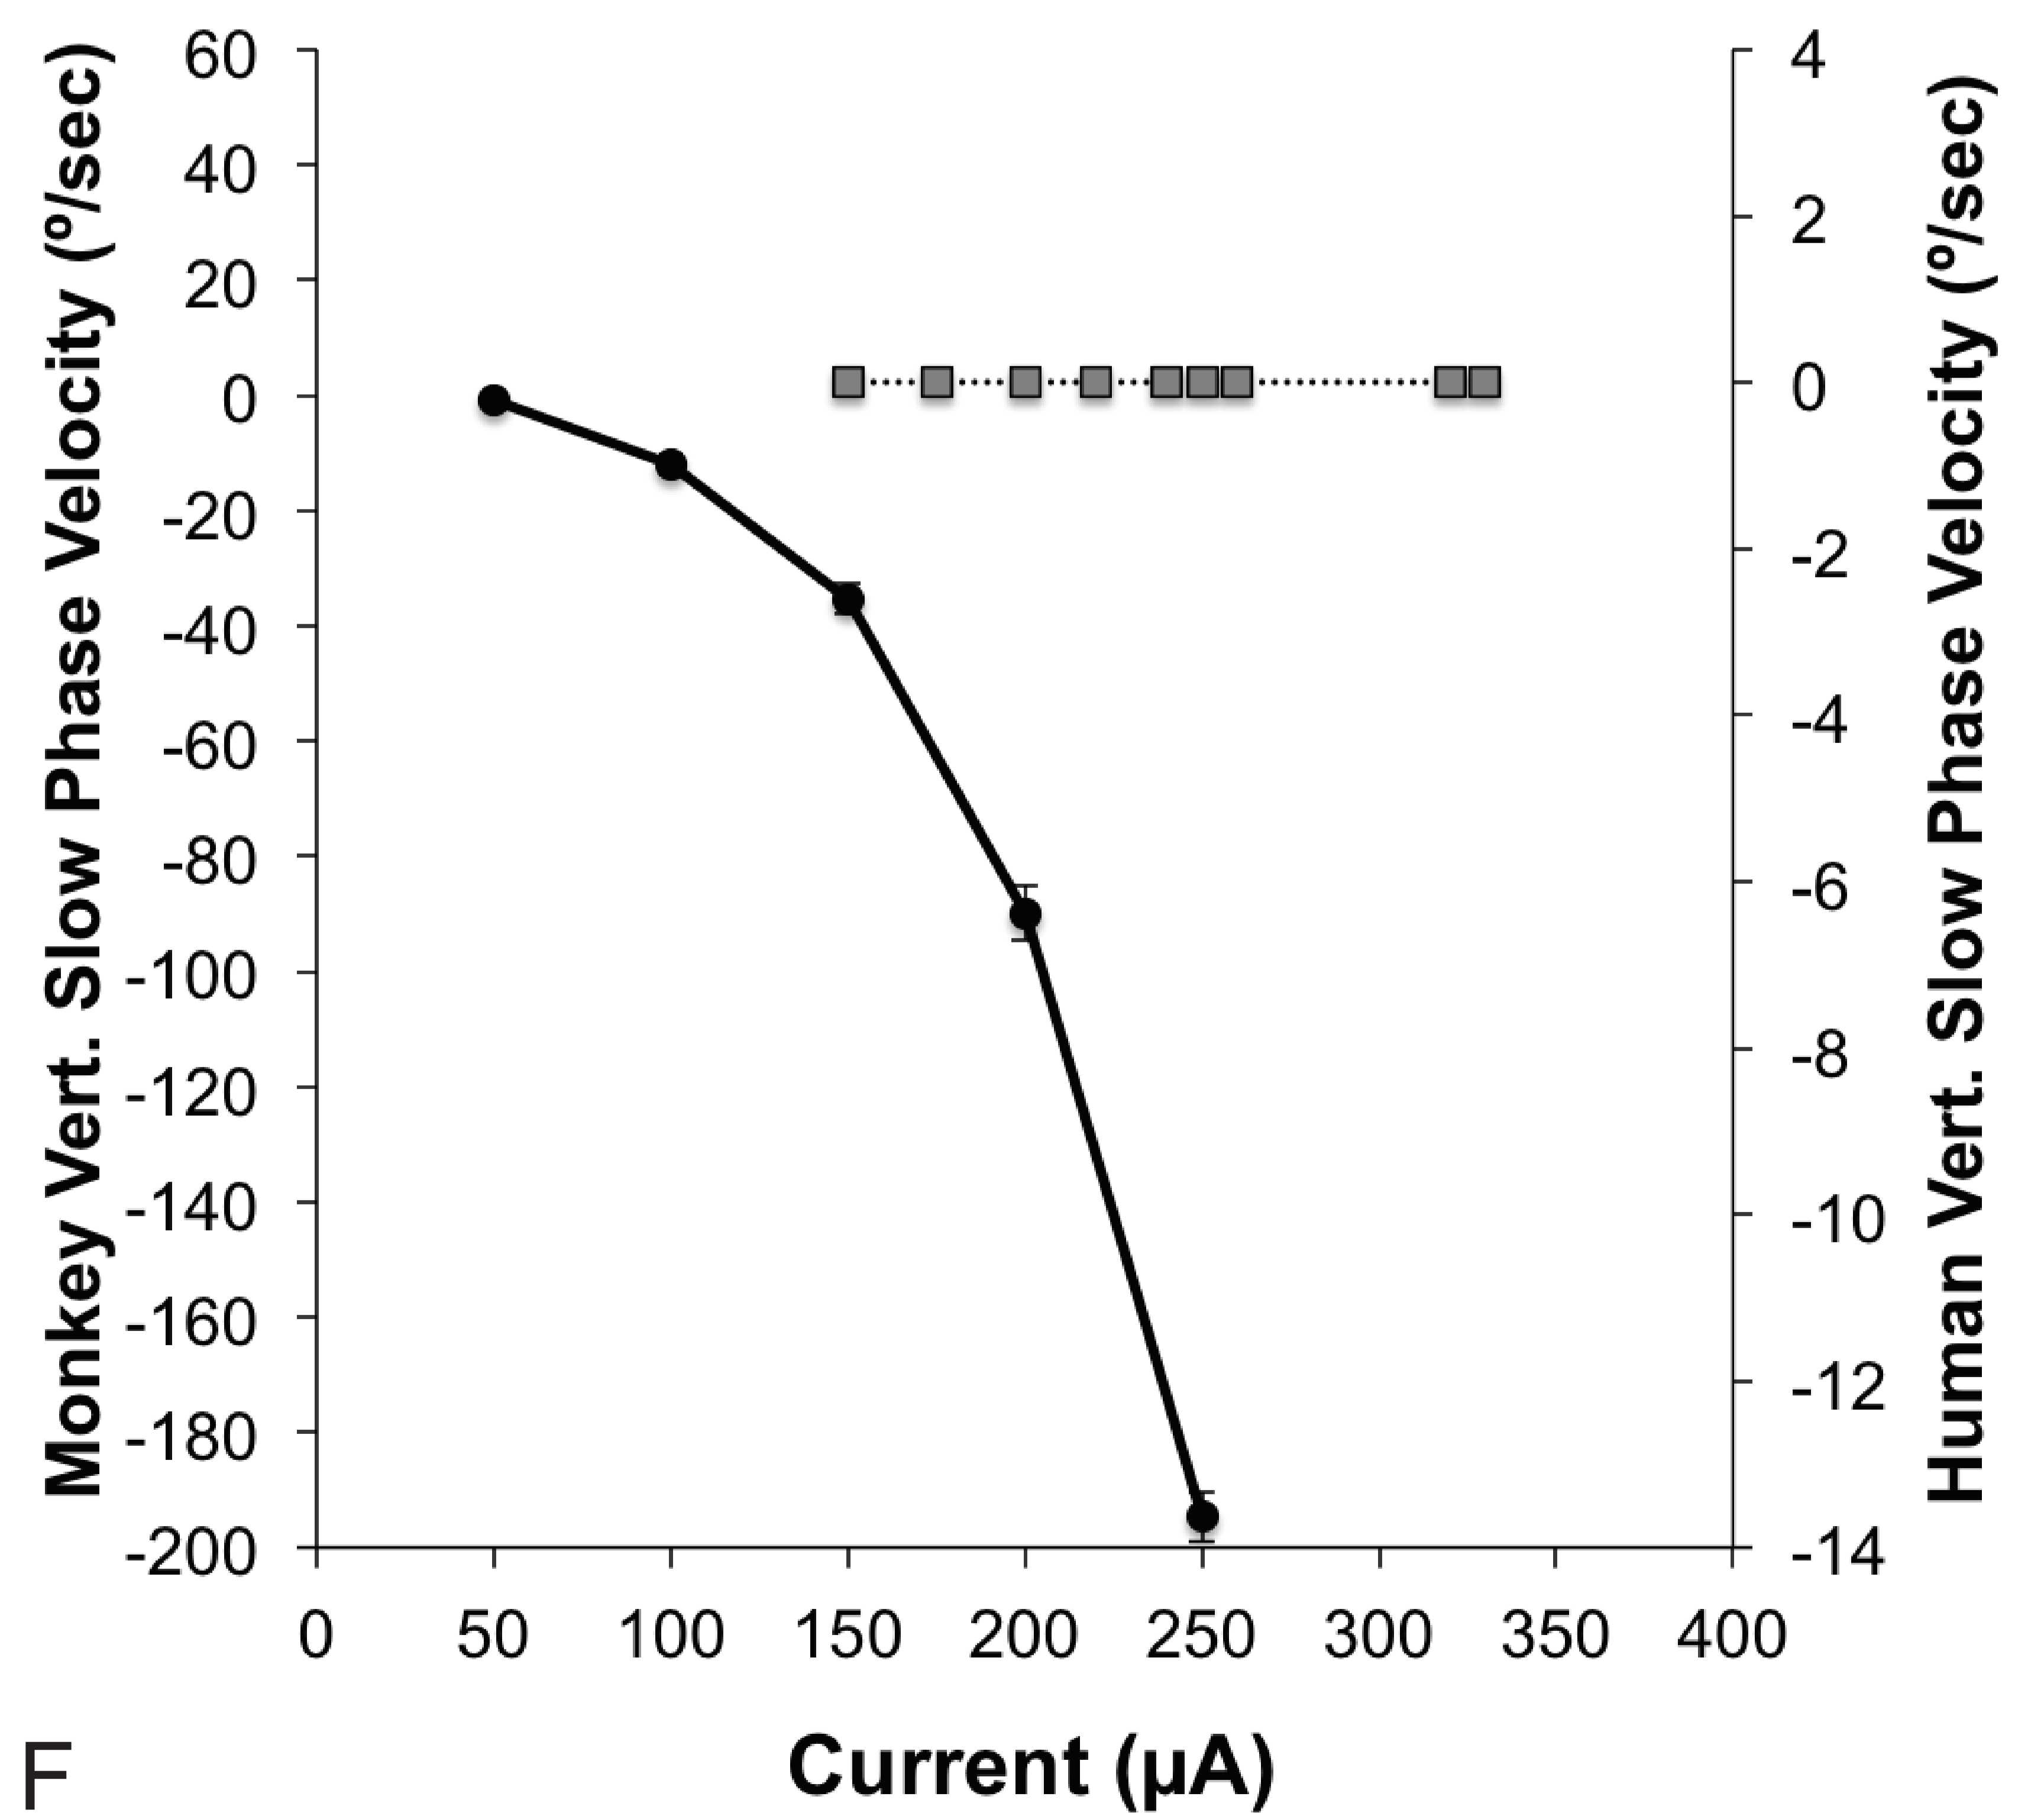

F

Supplement: NIHMS512515-supplement-3.pdf [file NIHMS512515-supplement-3.pdf]

# Supp Figure 4

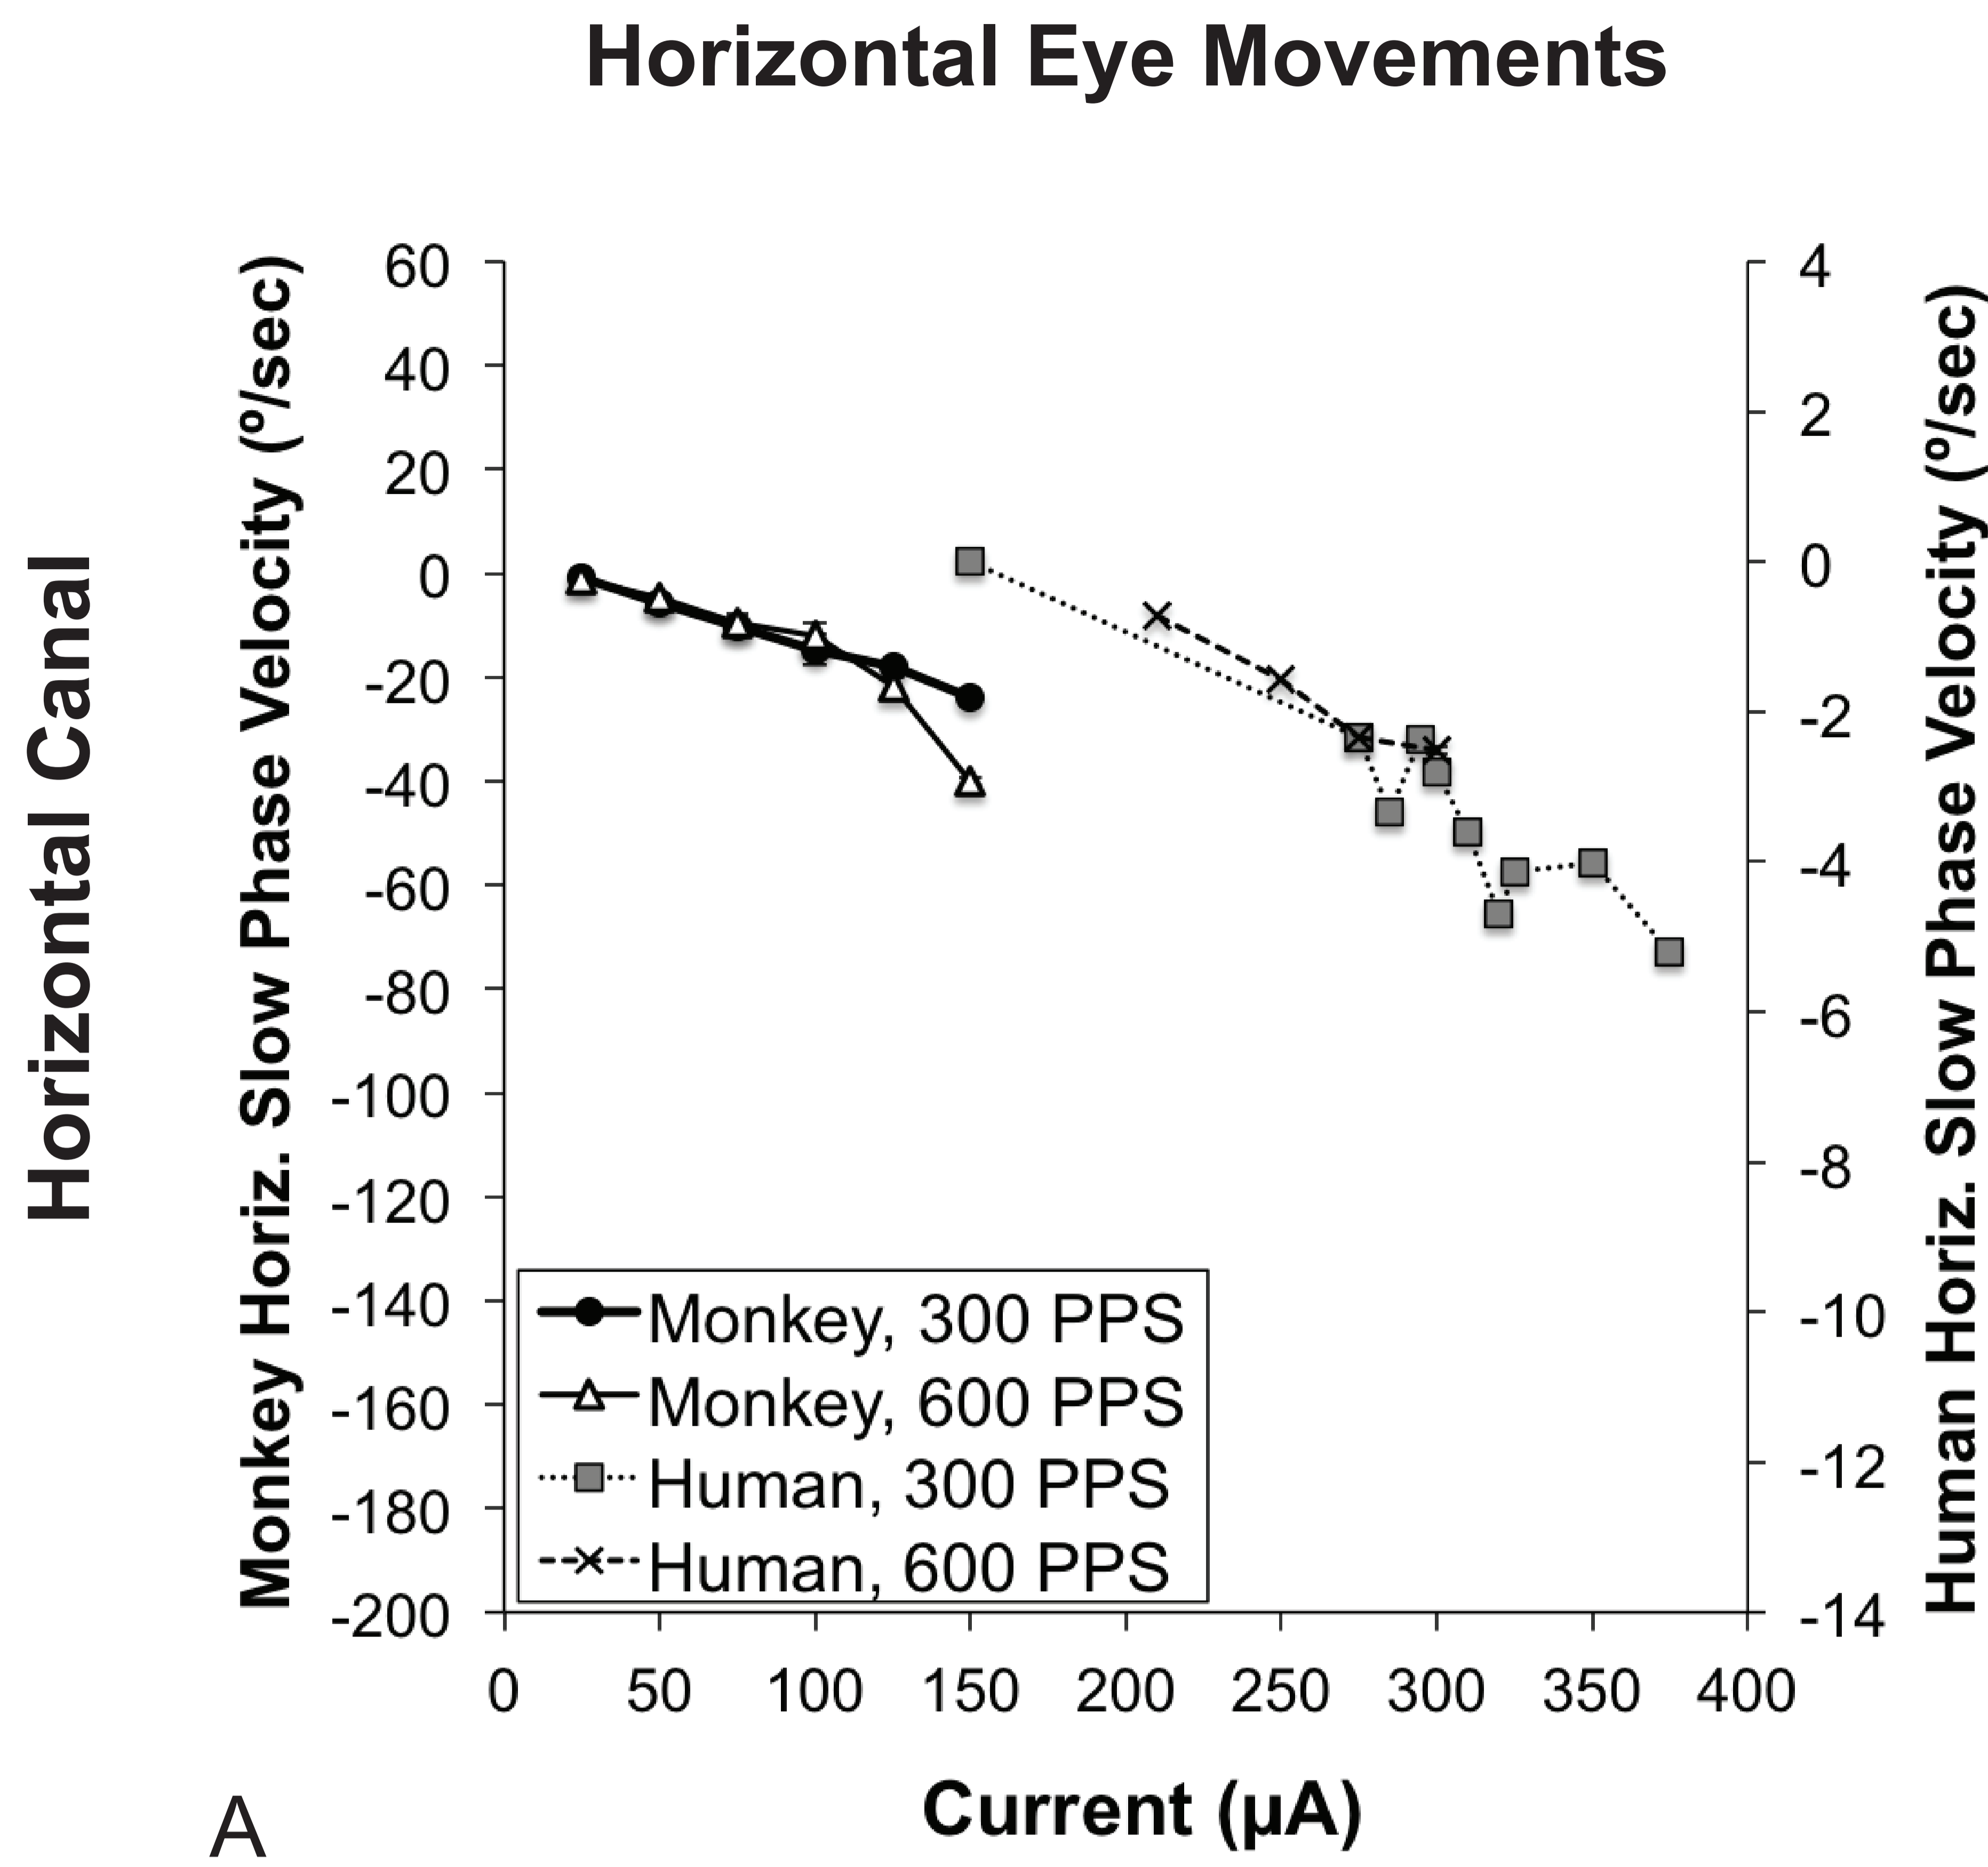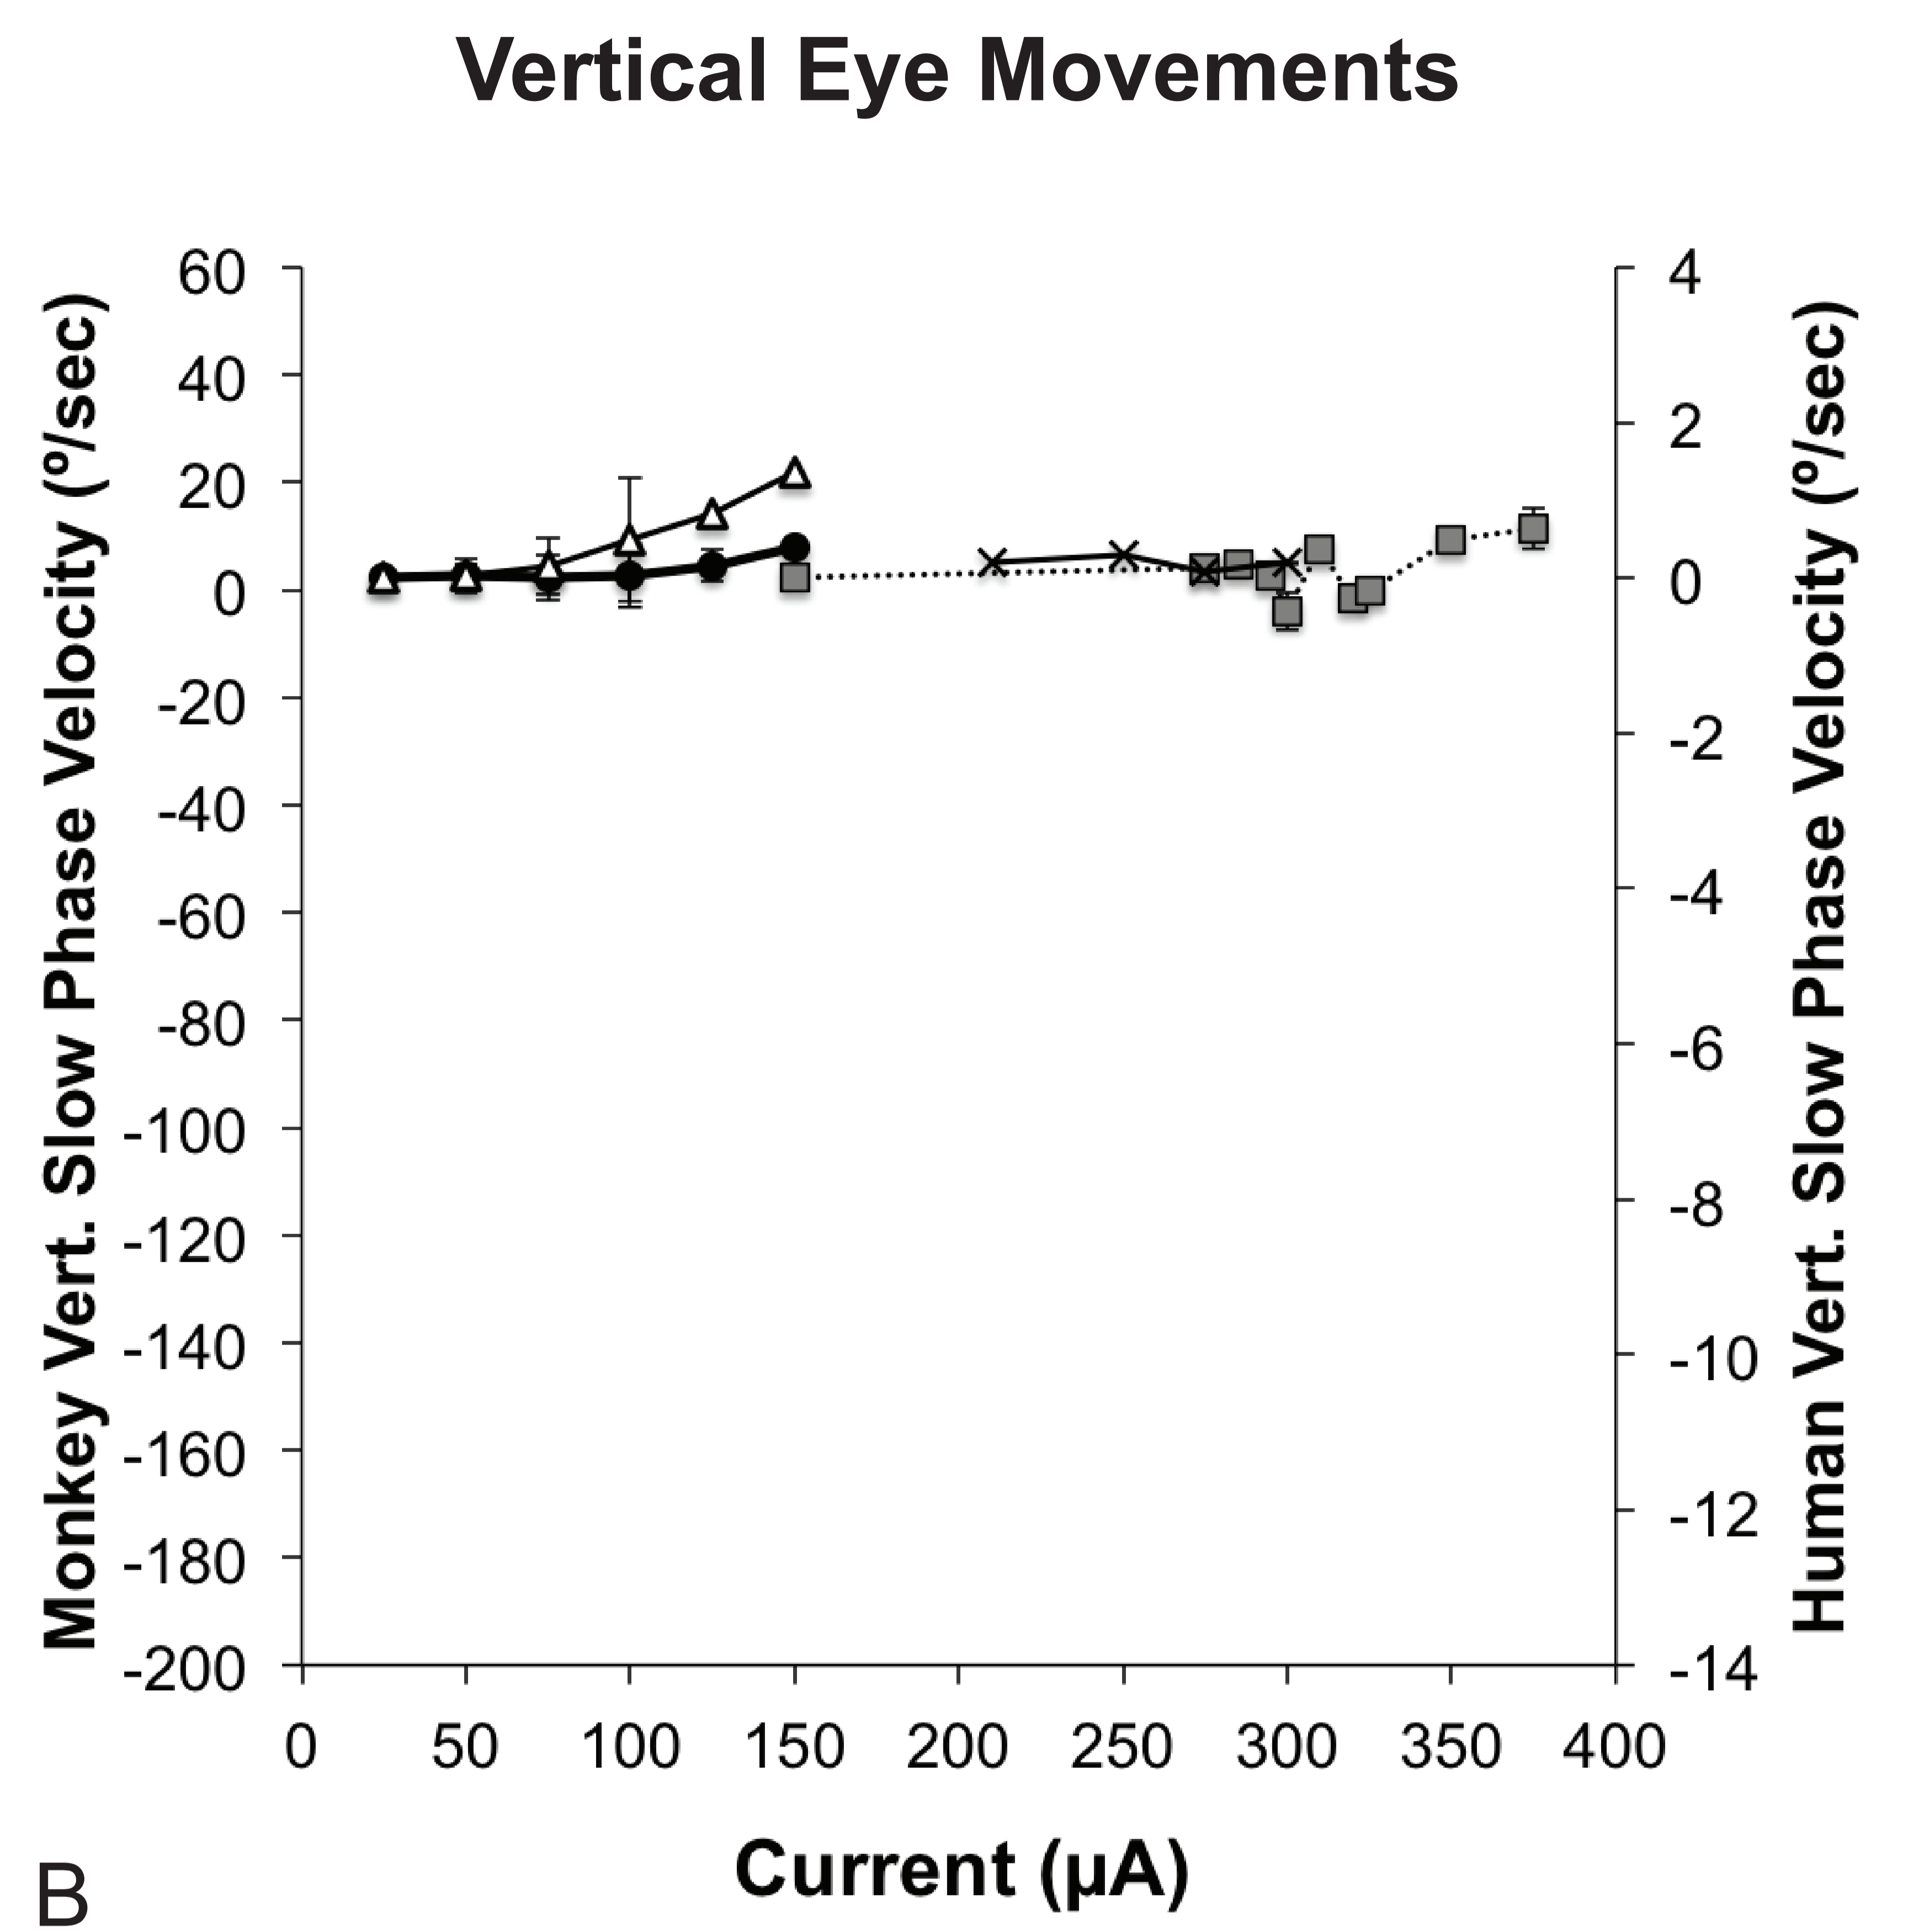

A

B

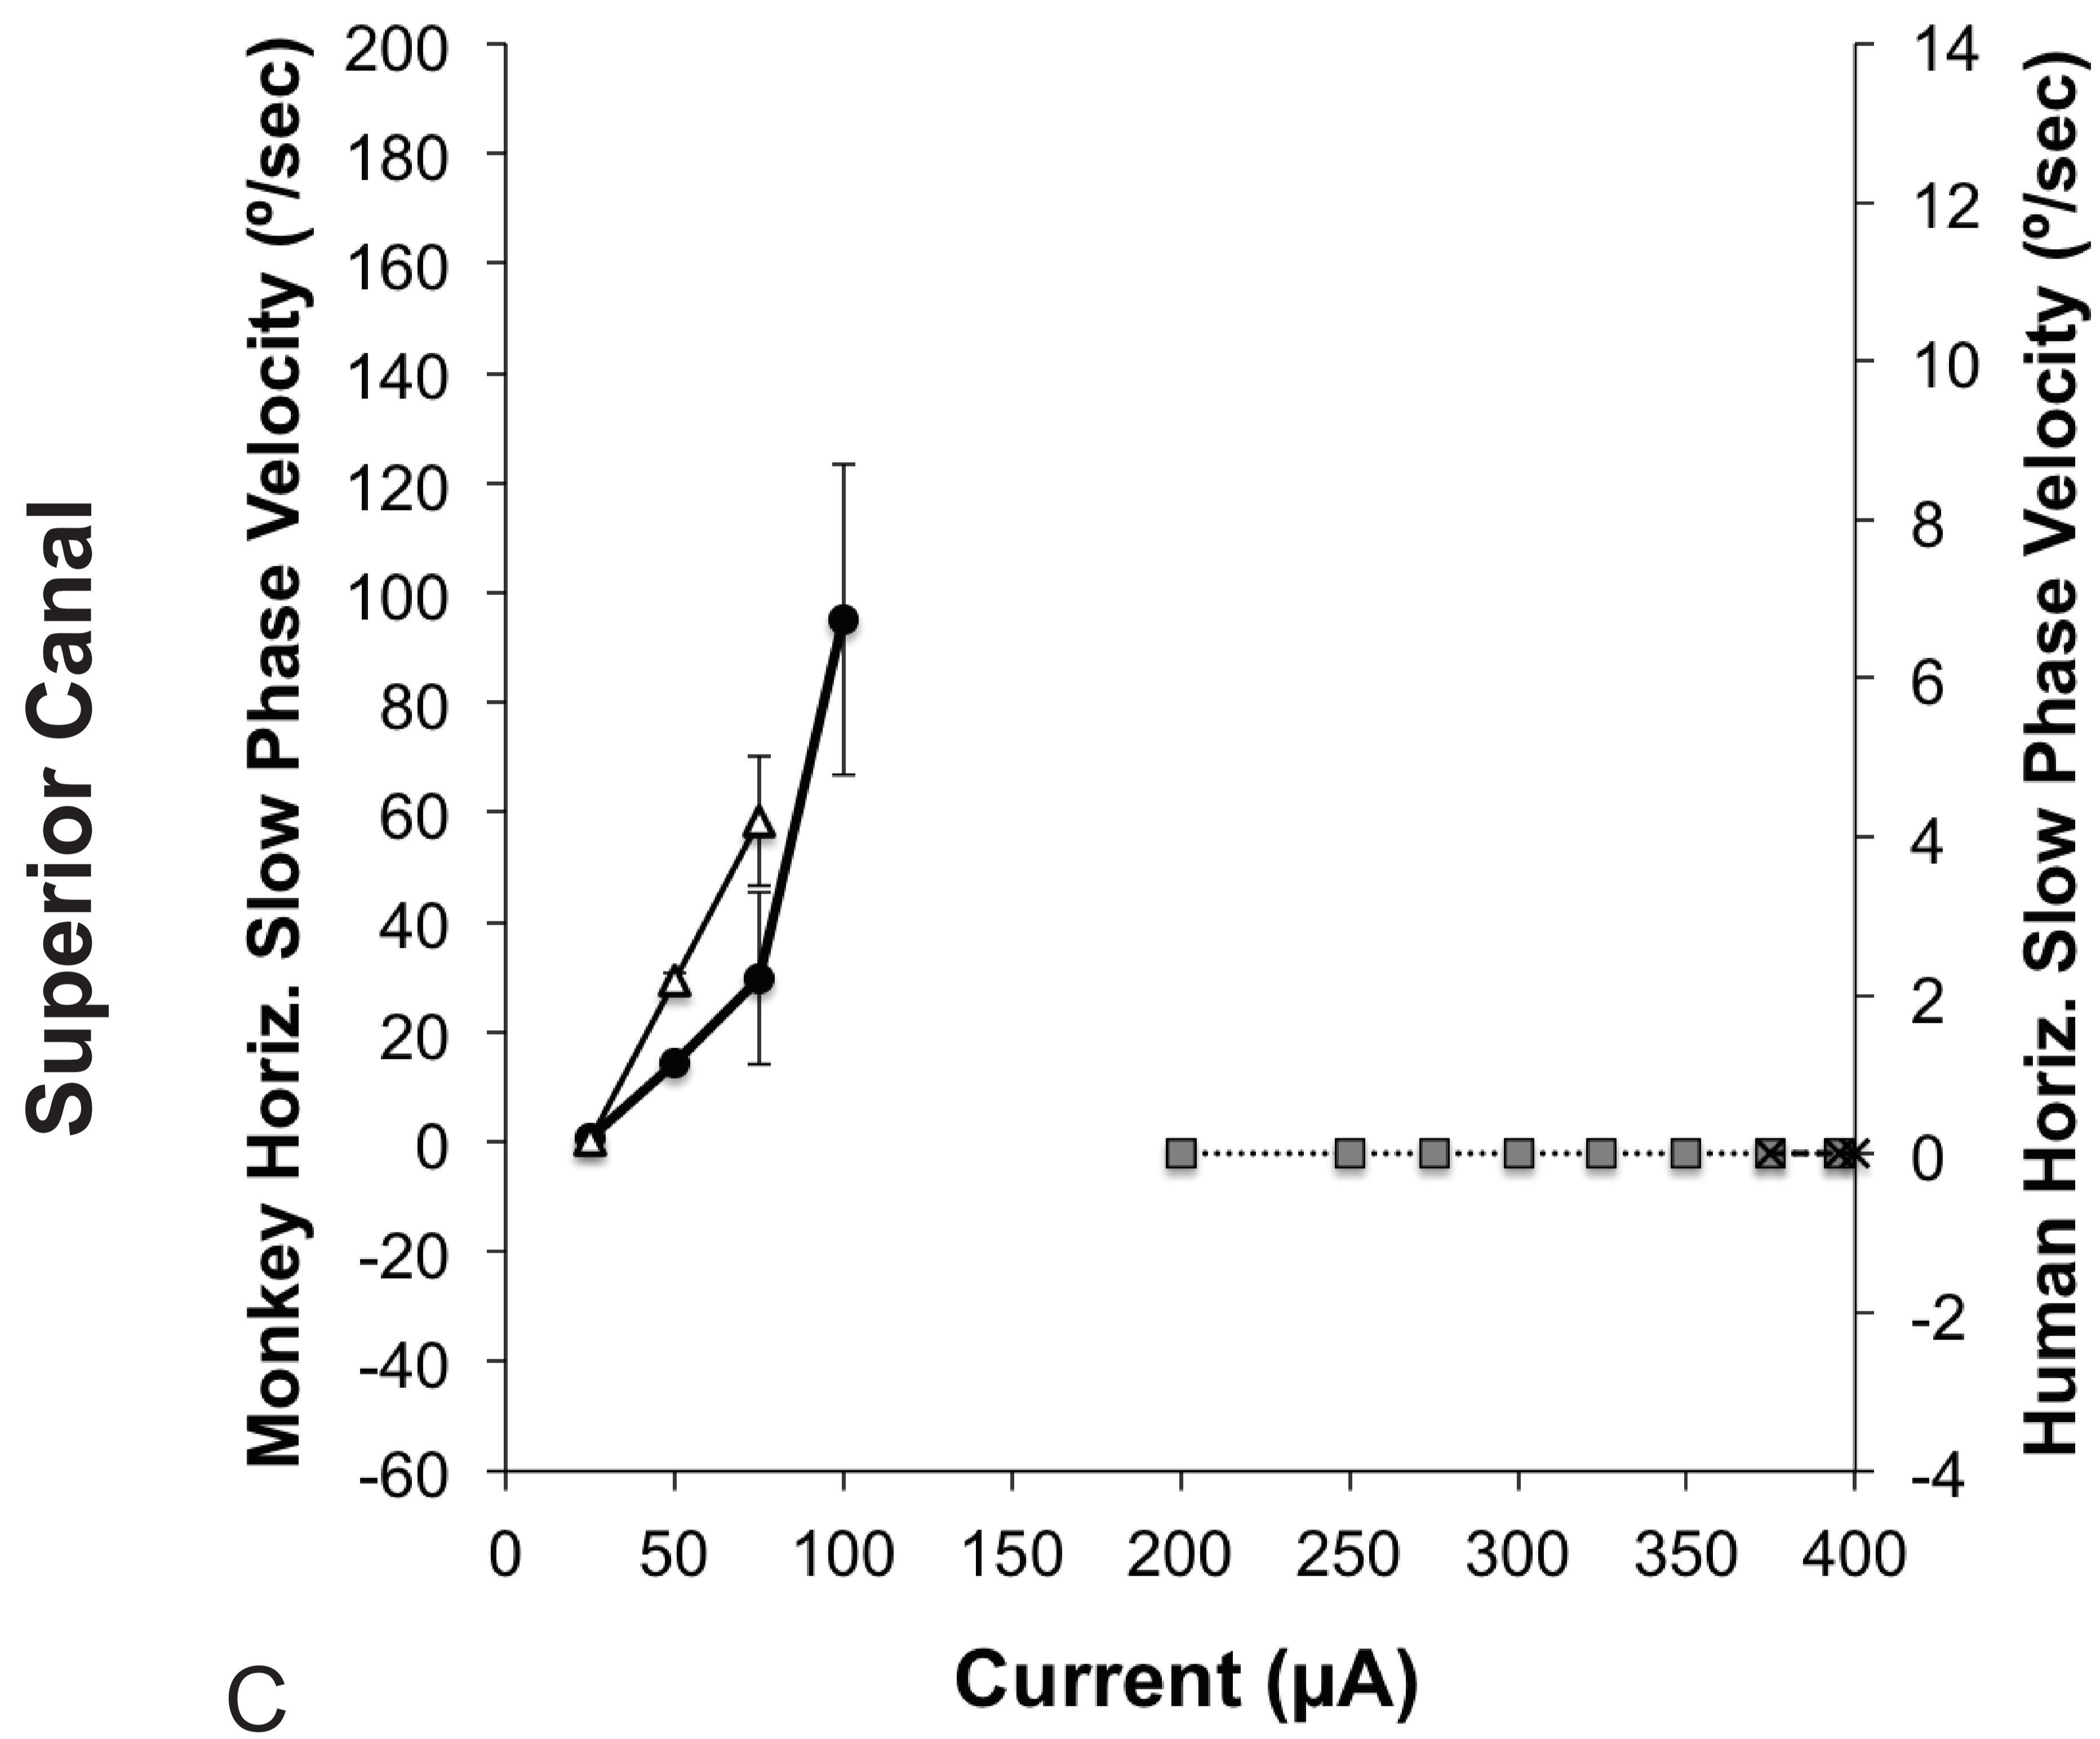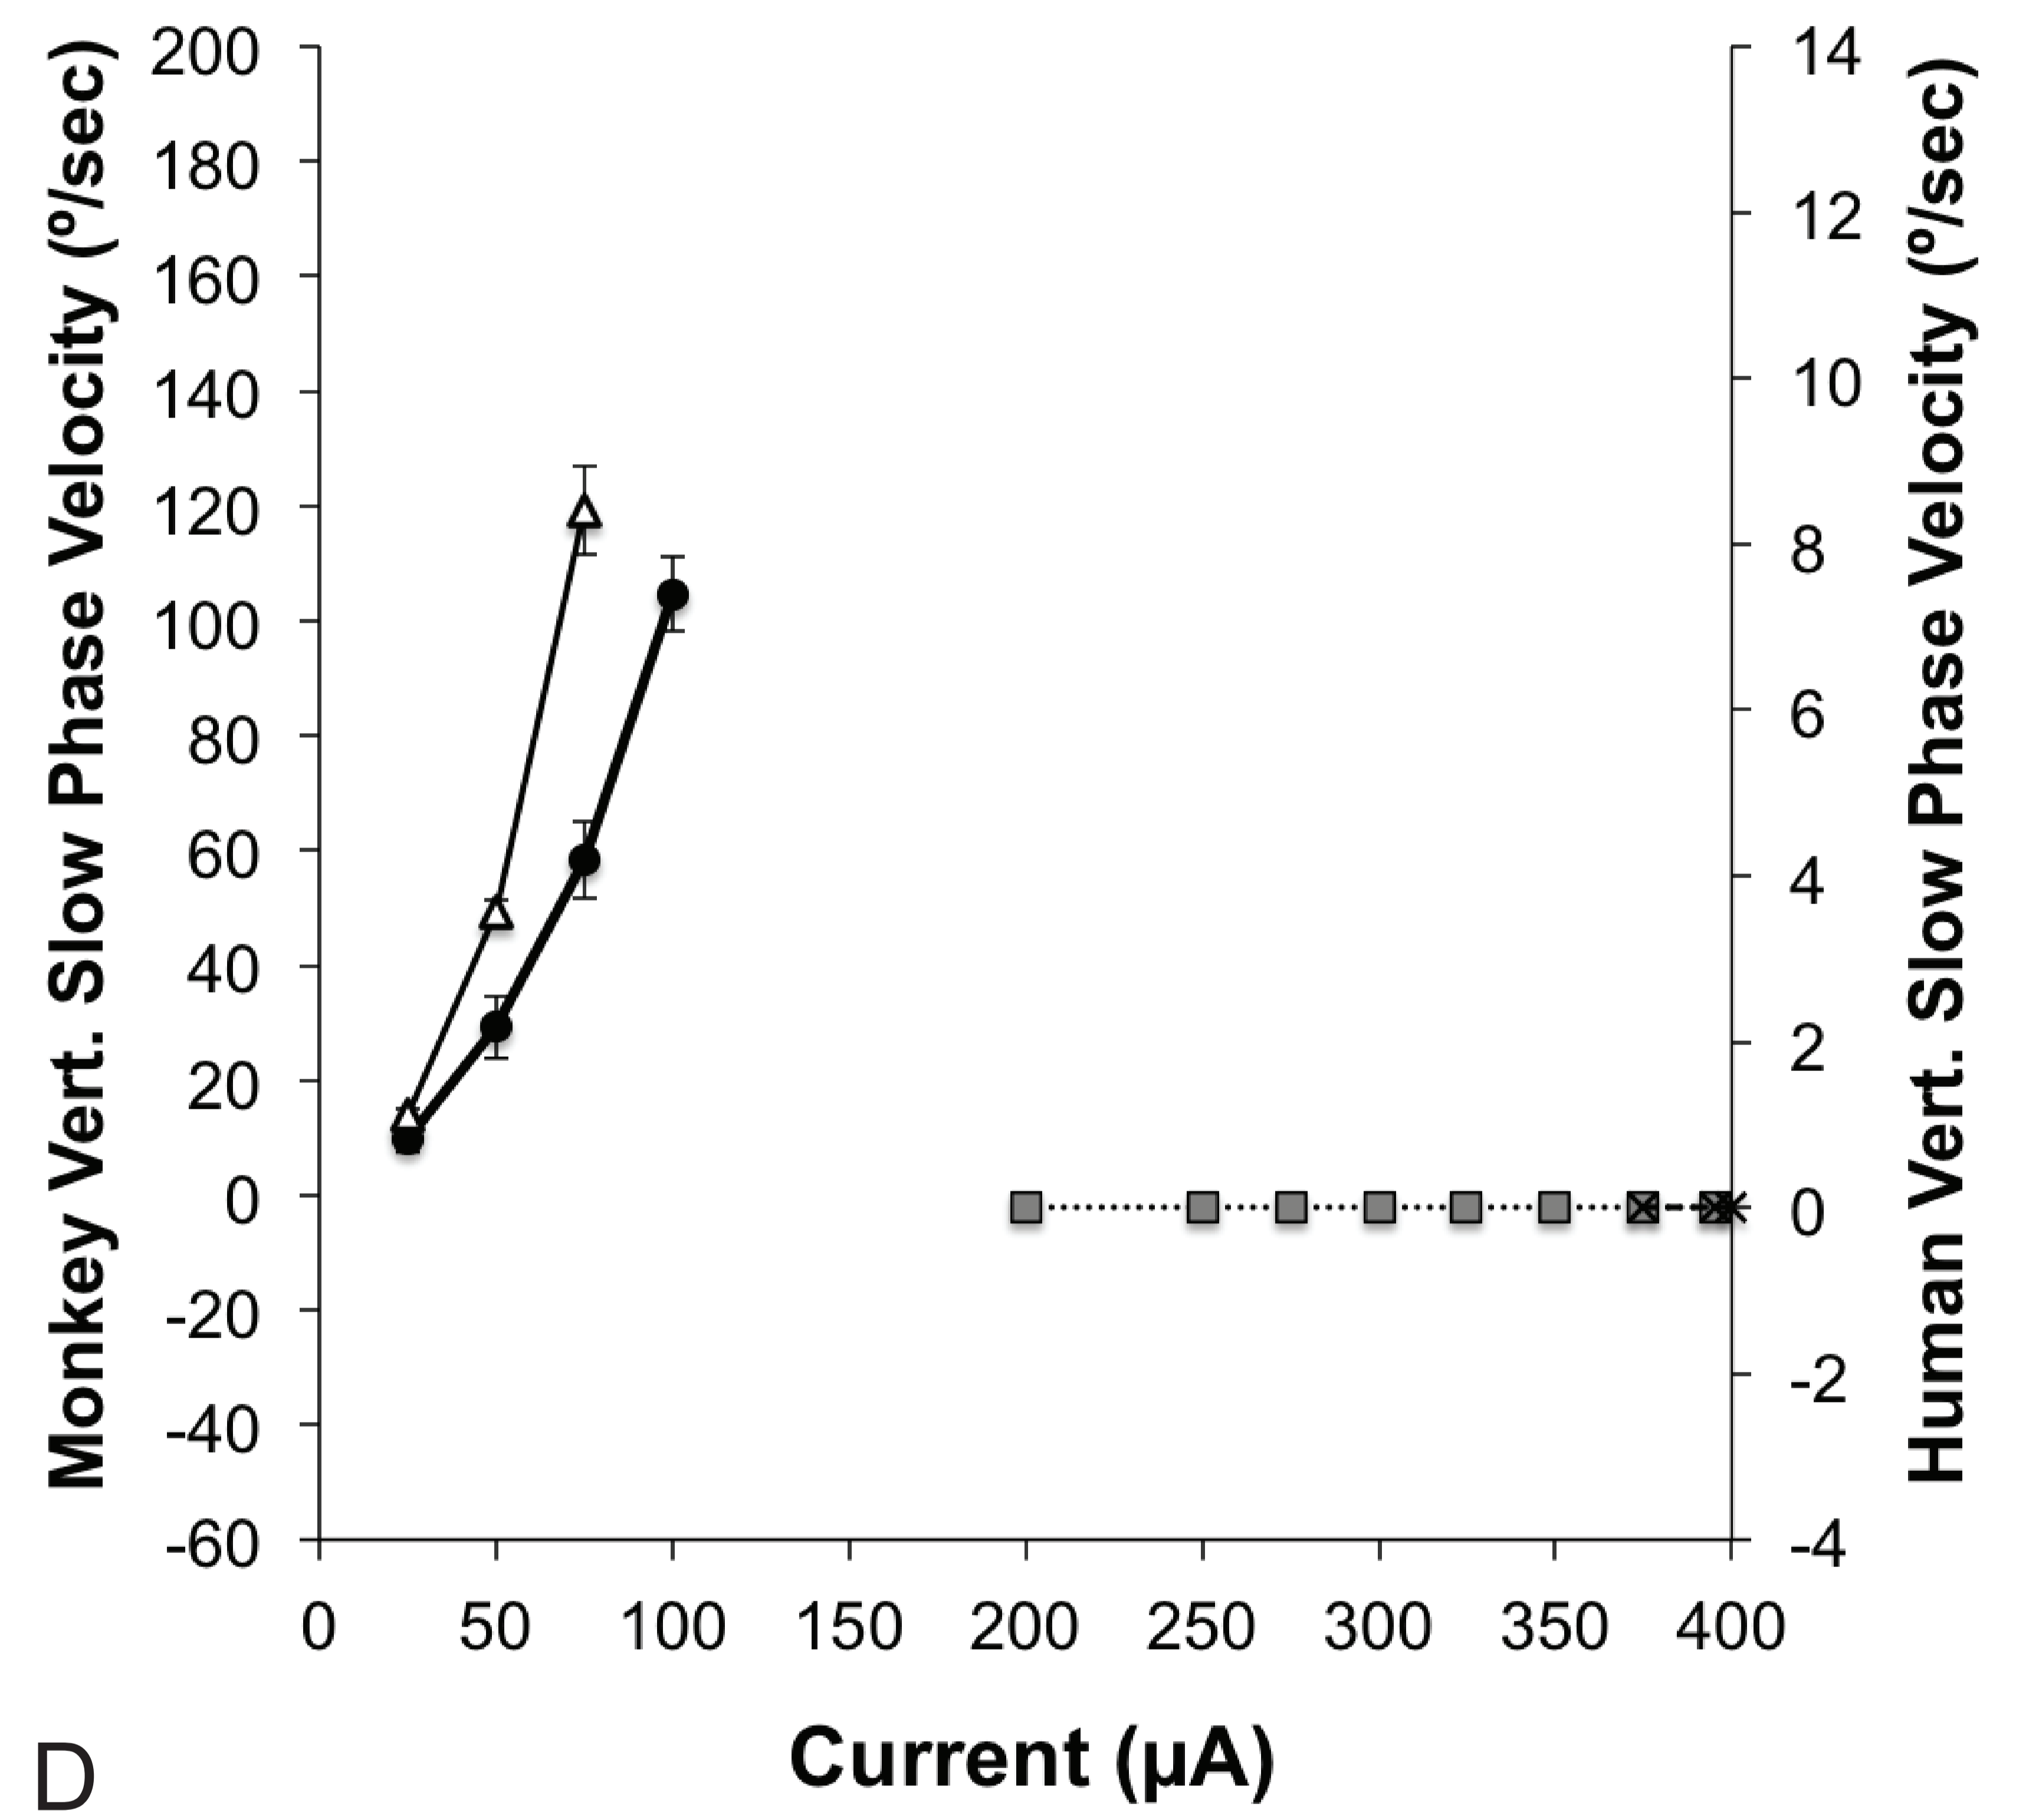

C

D

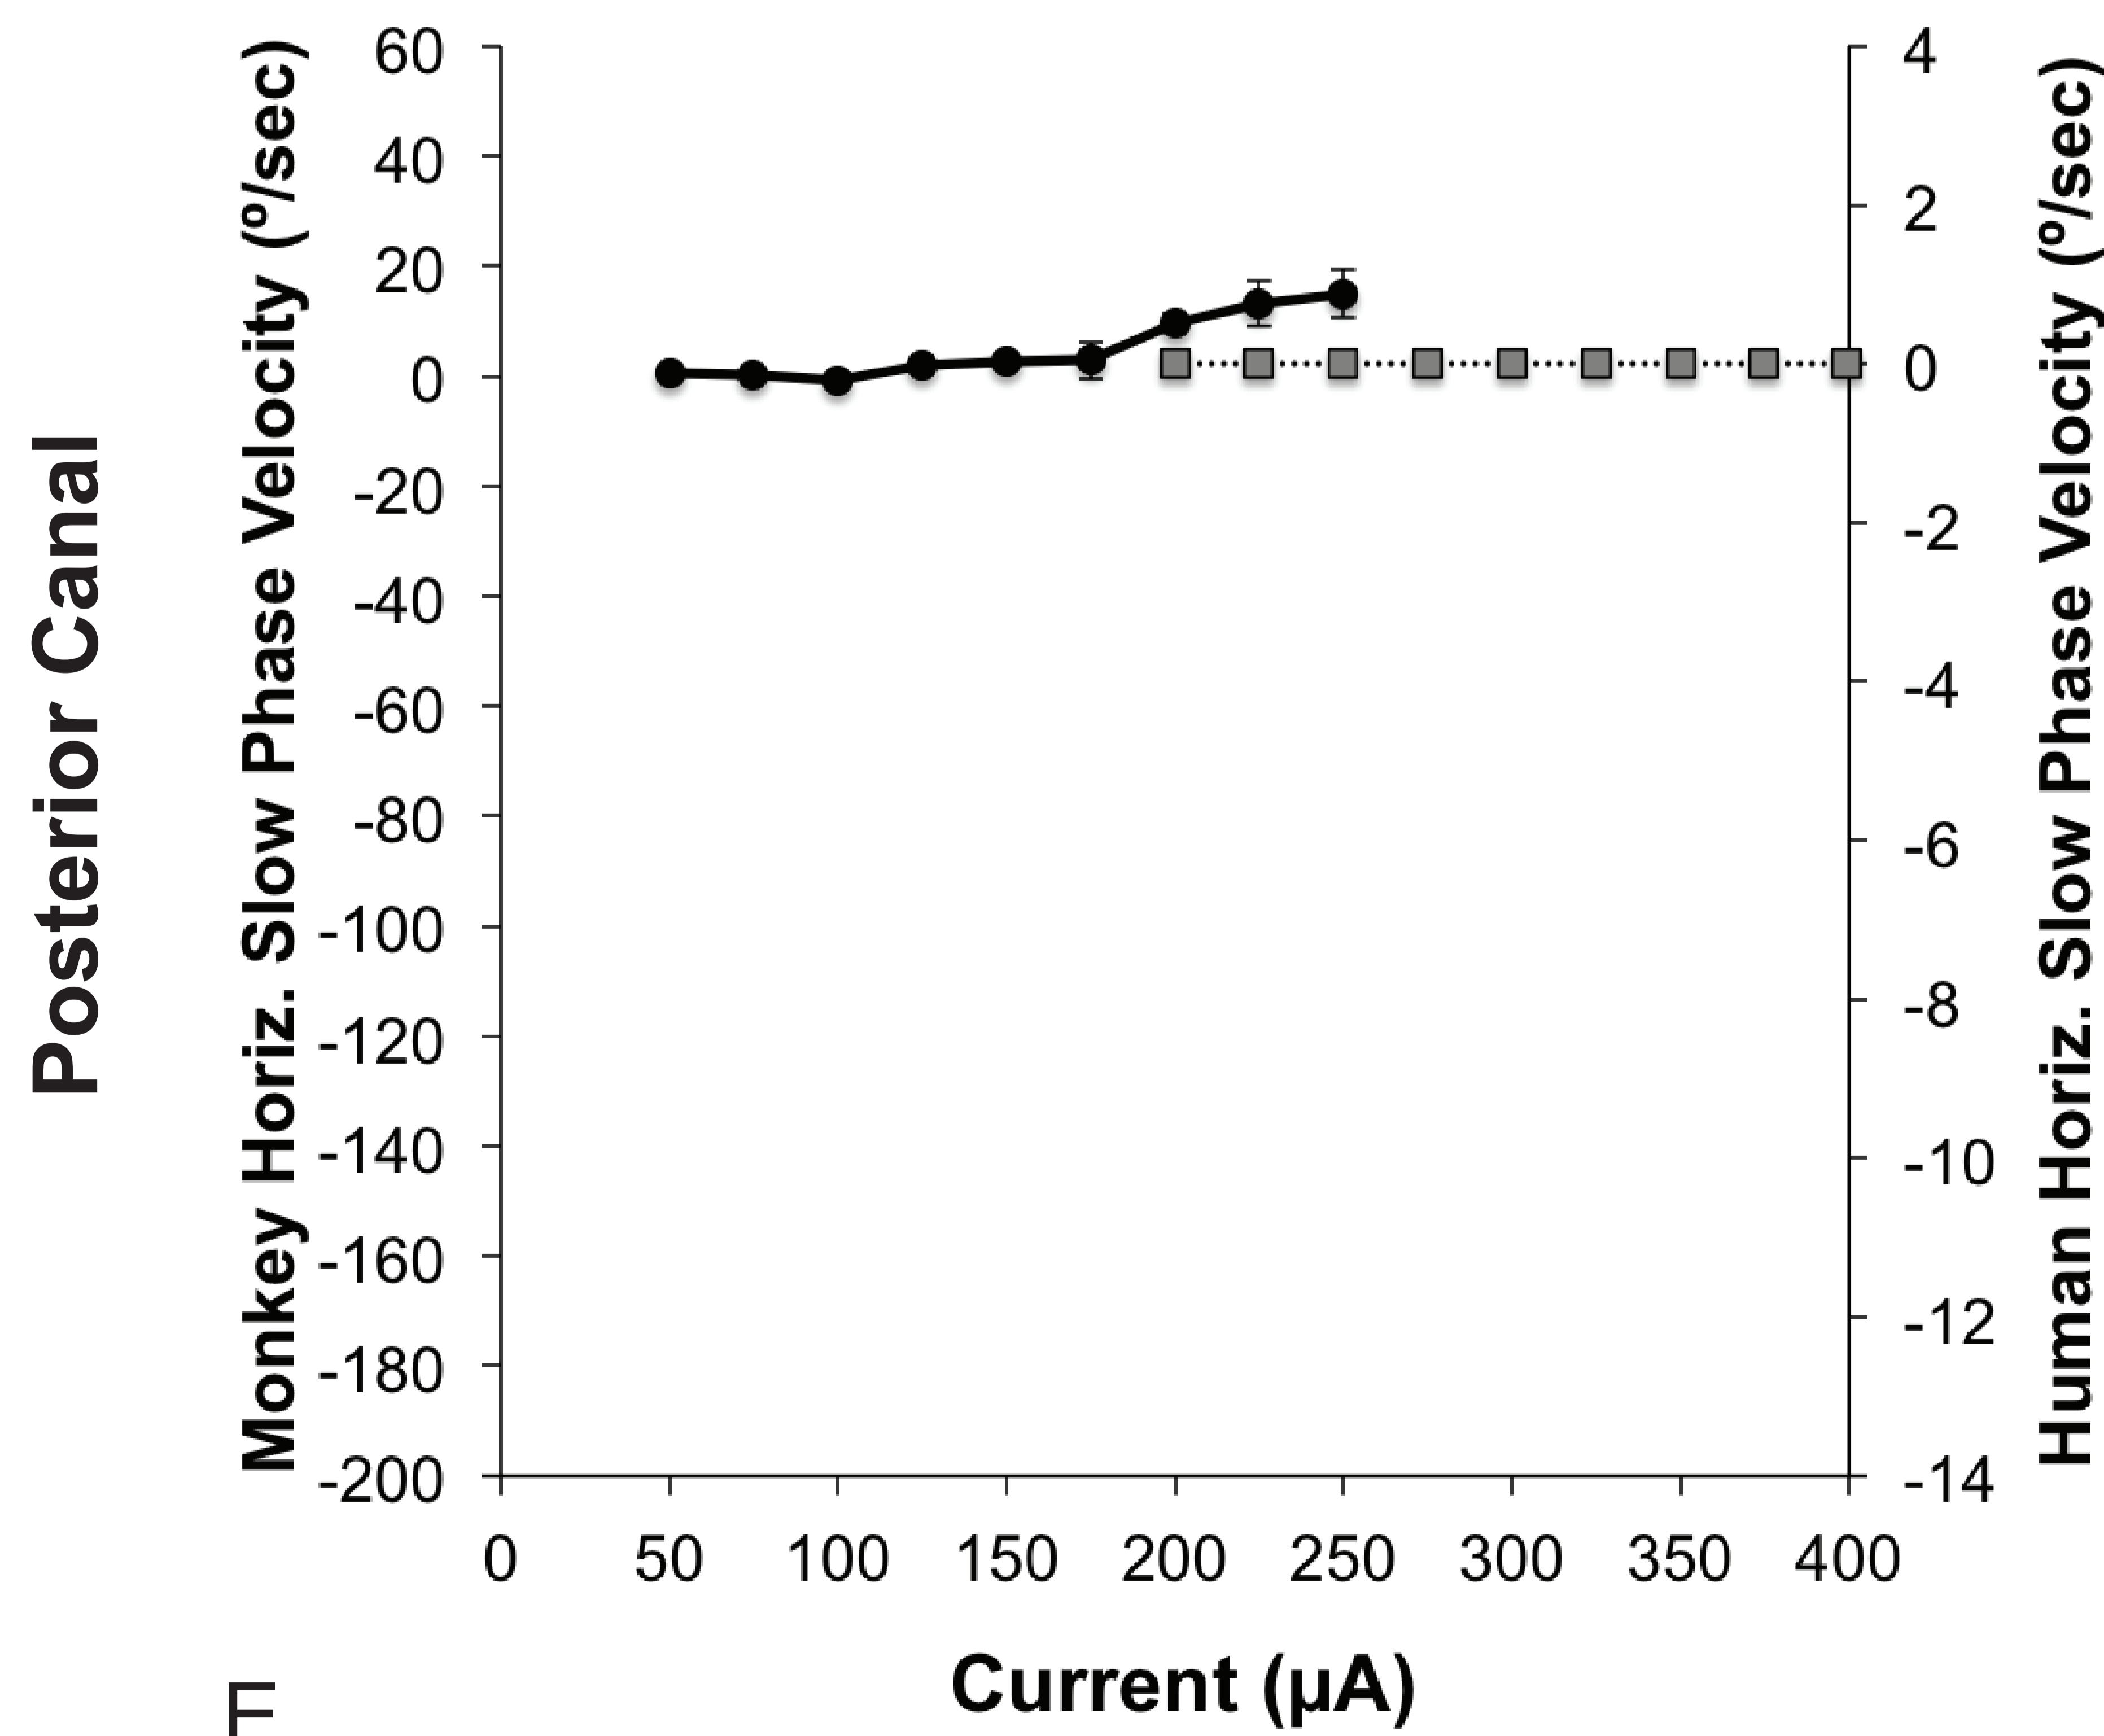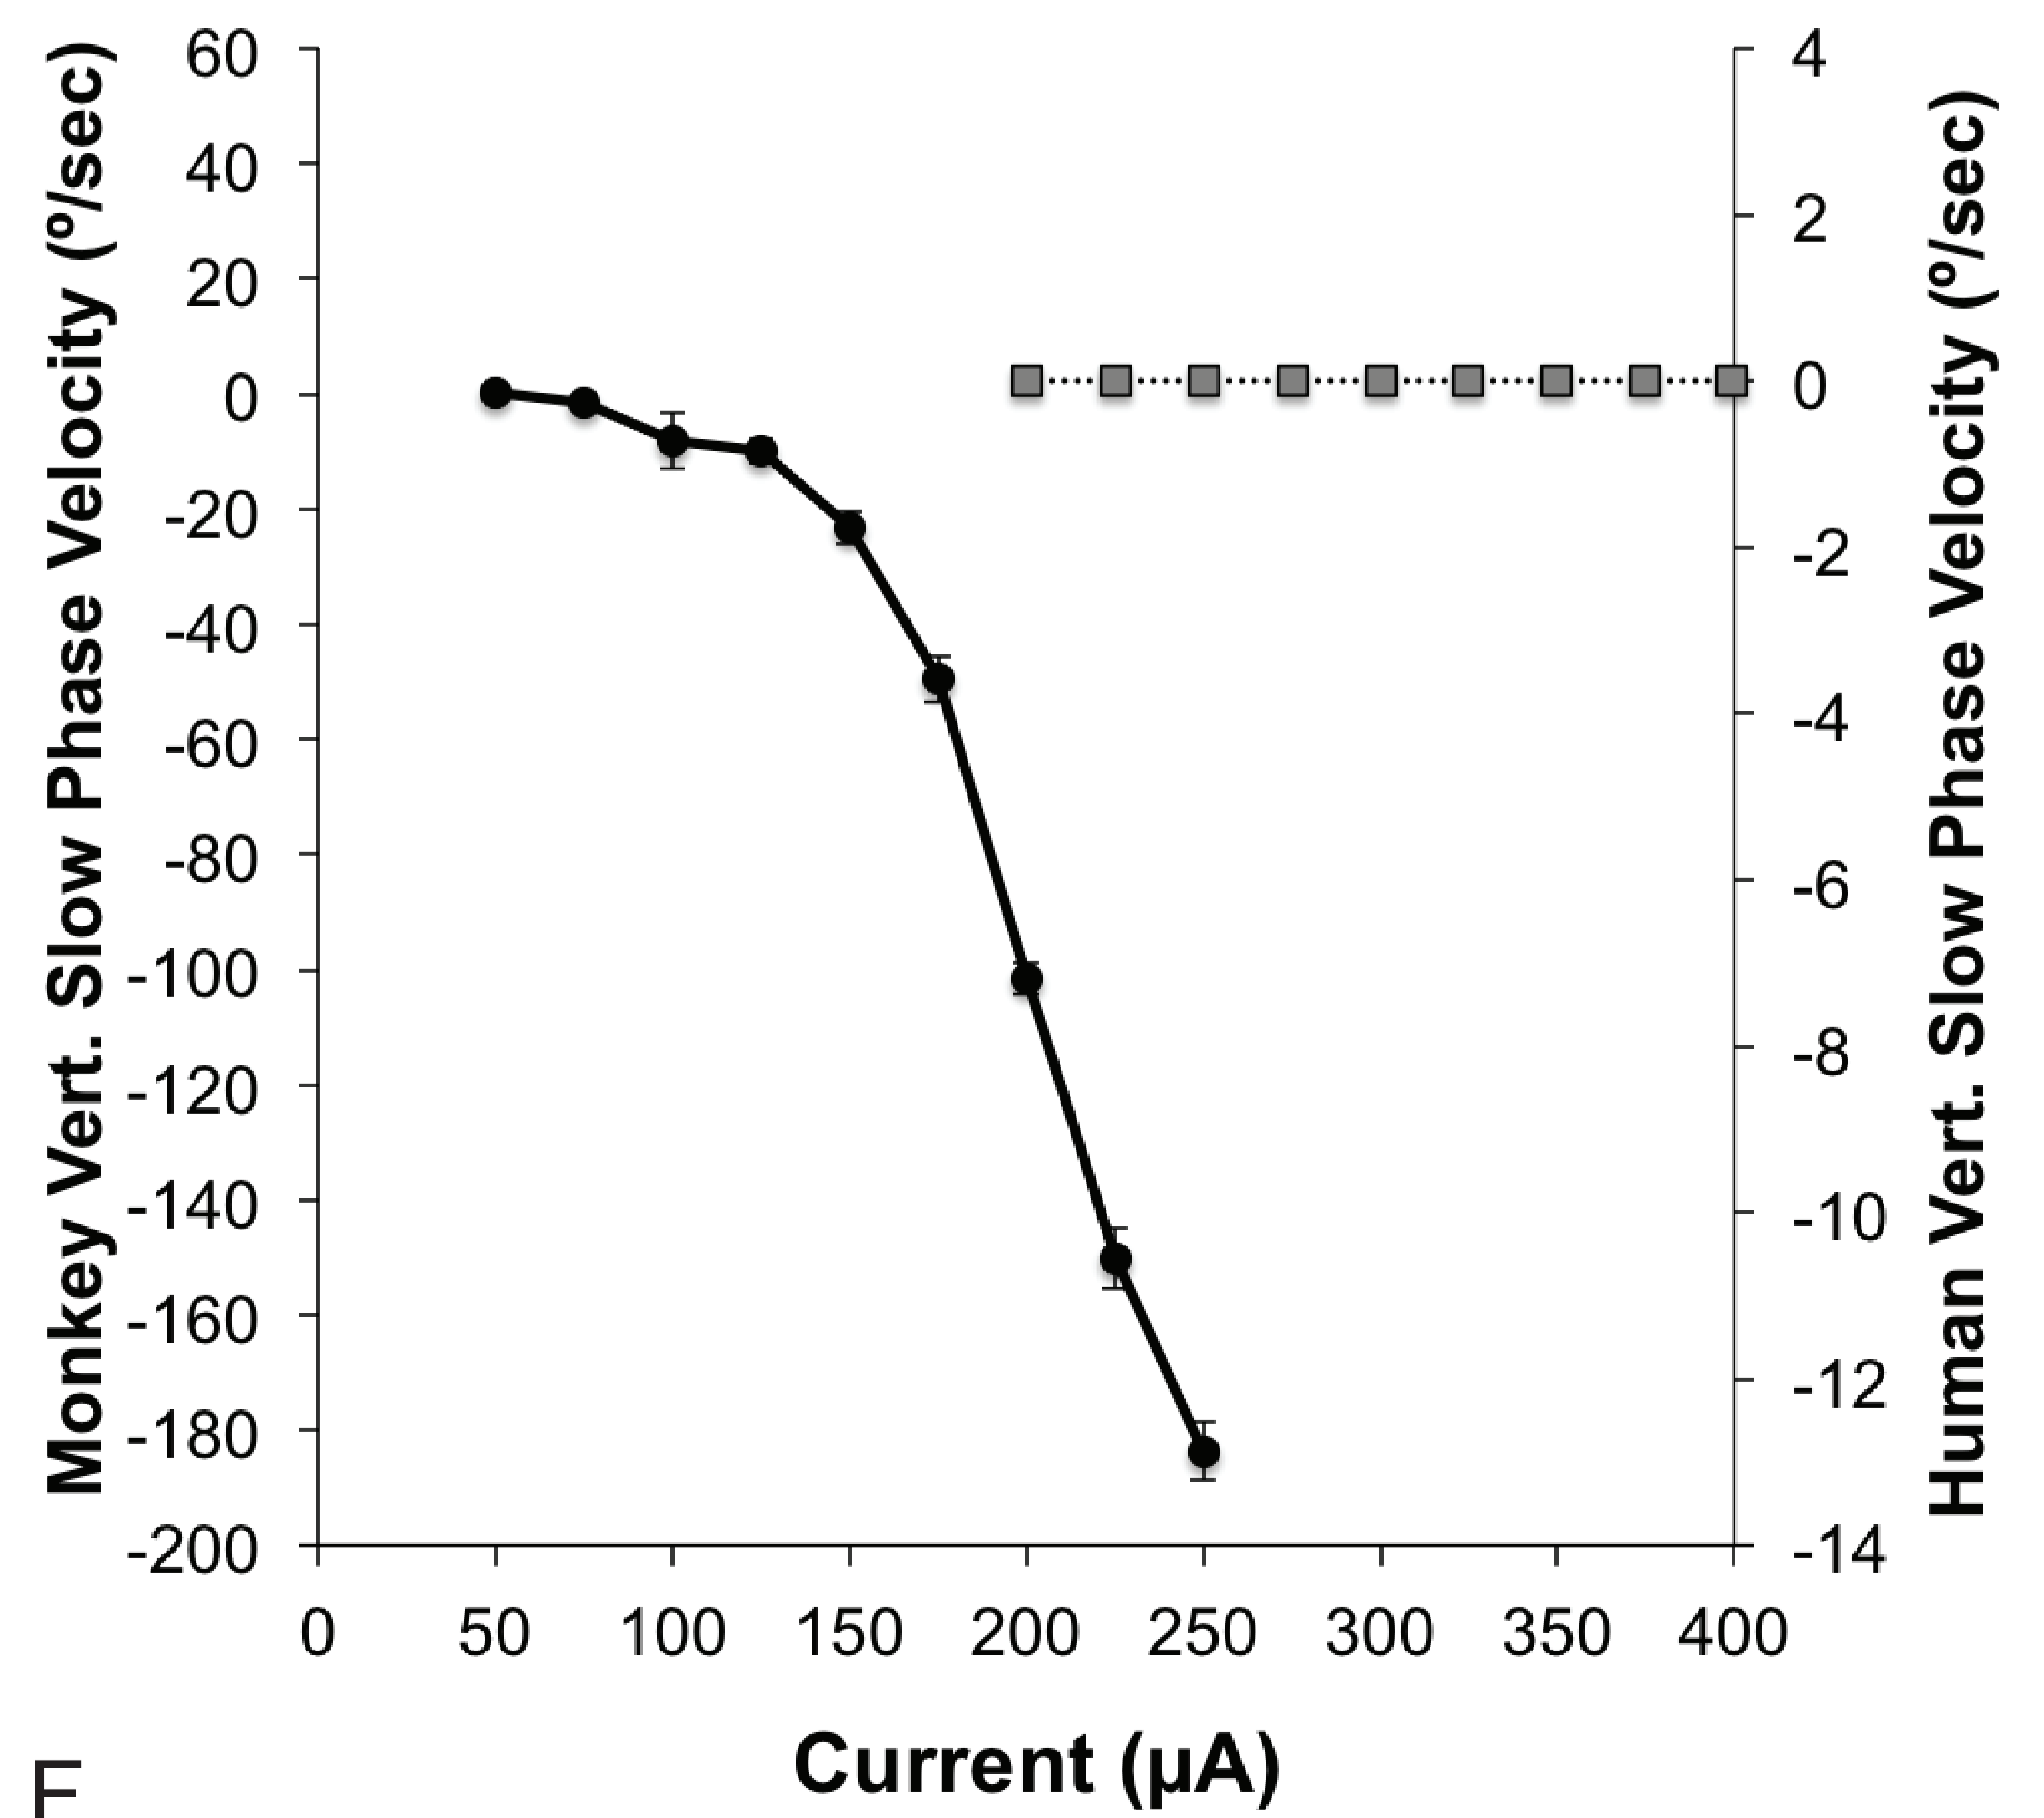

E

F

Supplement: NIHMS512515-supplement-4.pdf [file NIHMS512515-supplement-4.pdf]

# Supp Fig 5

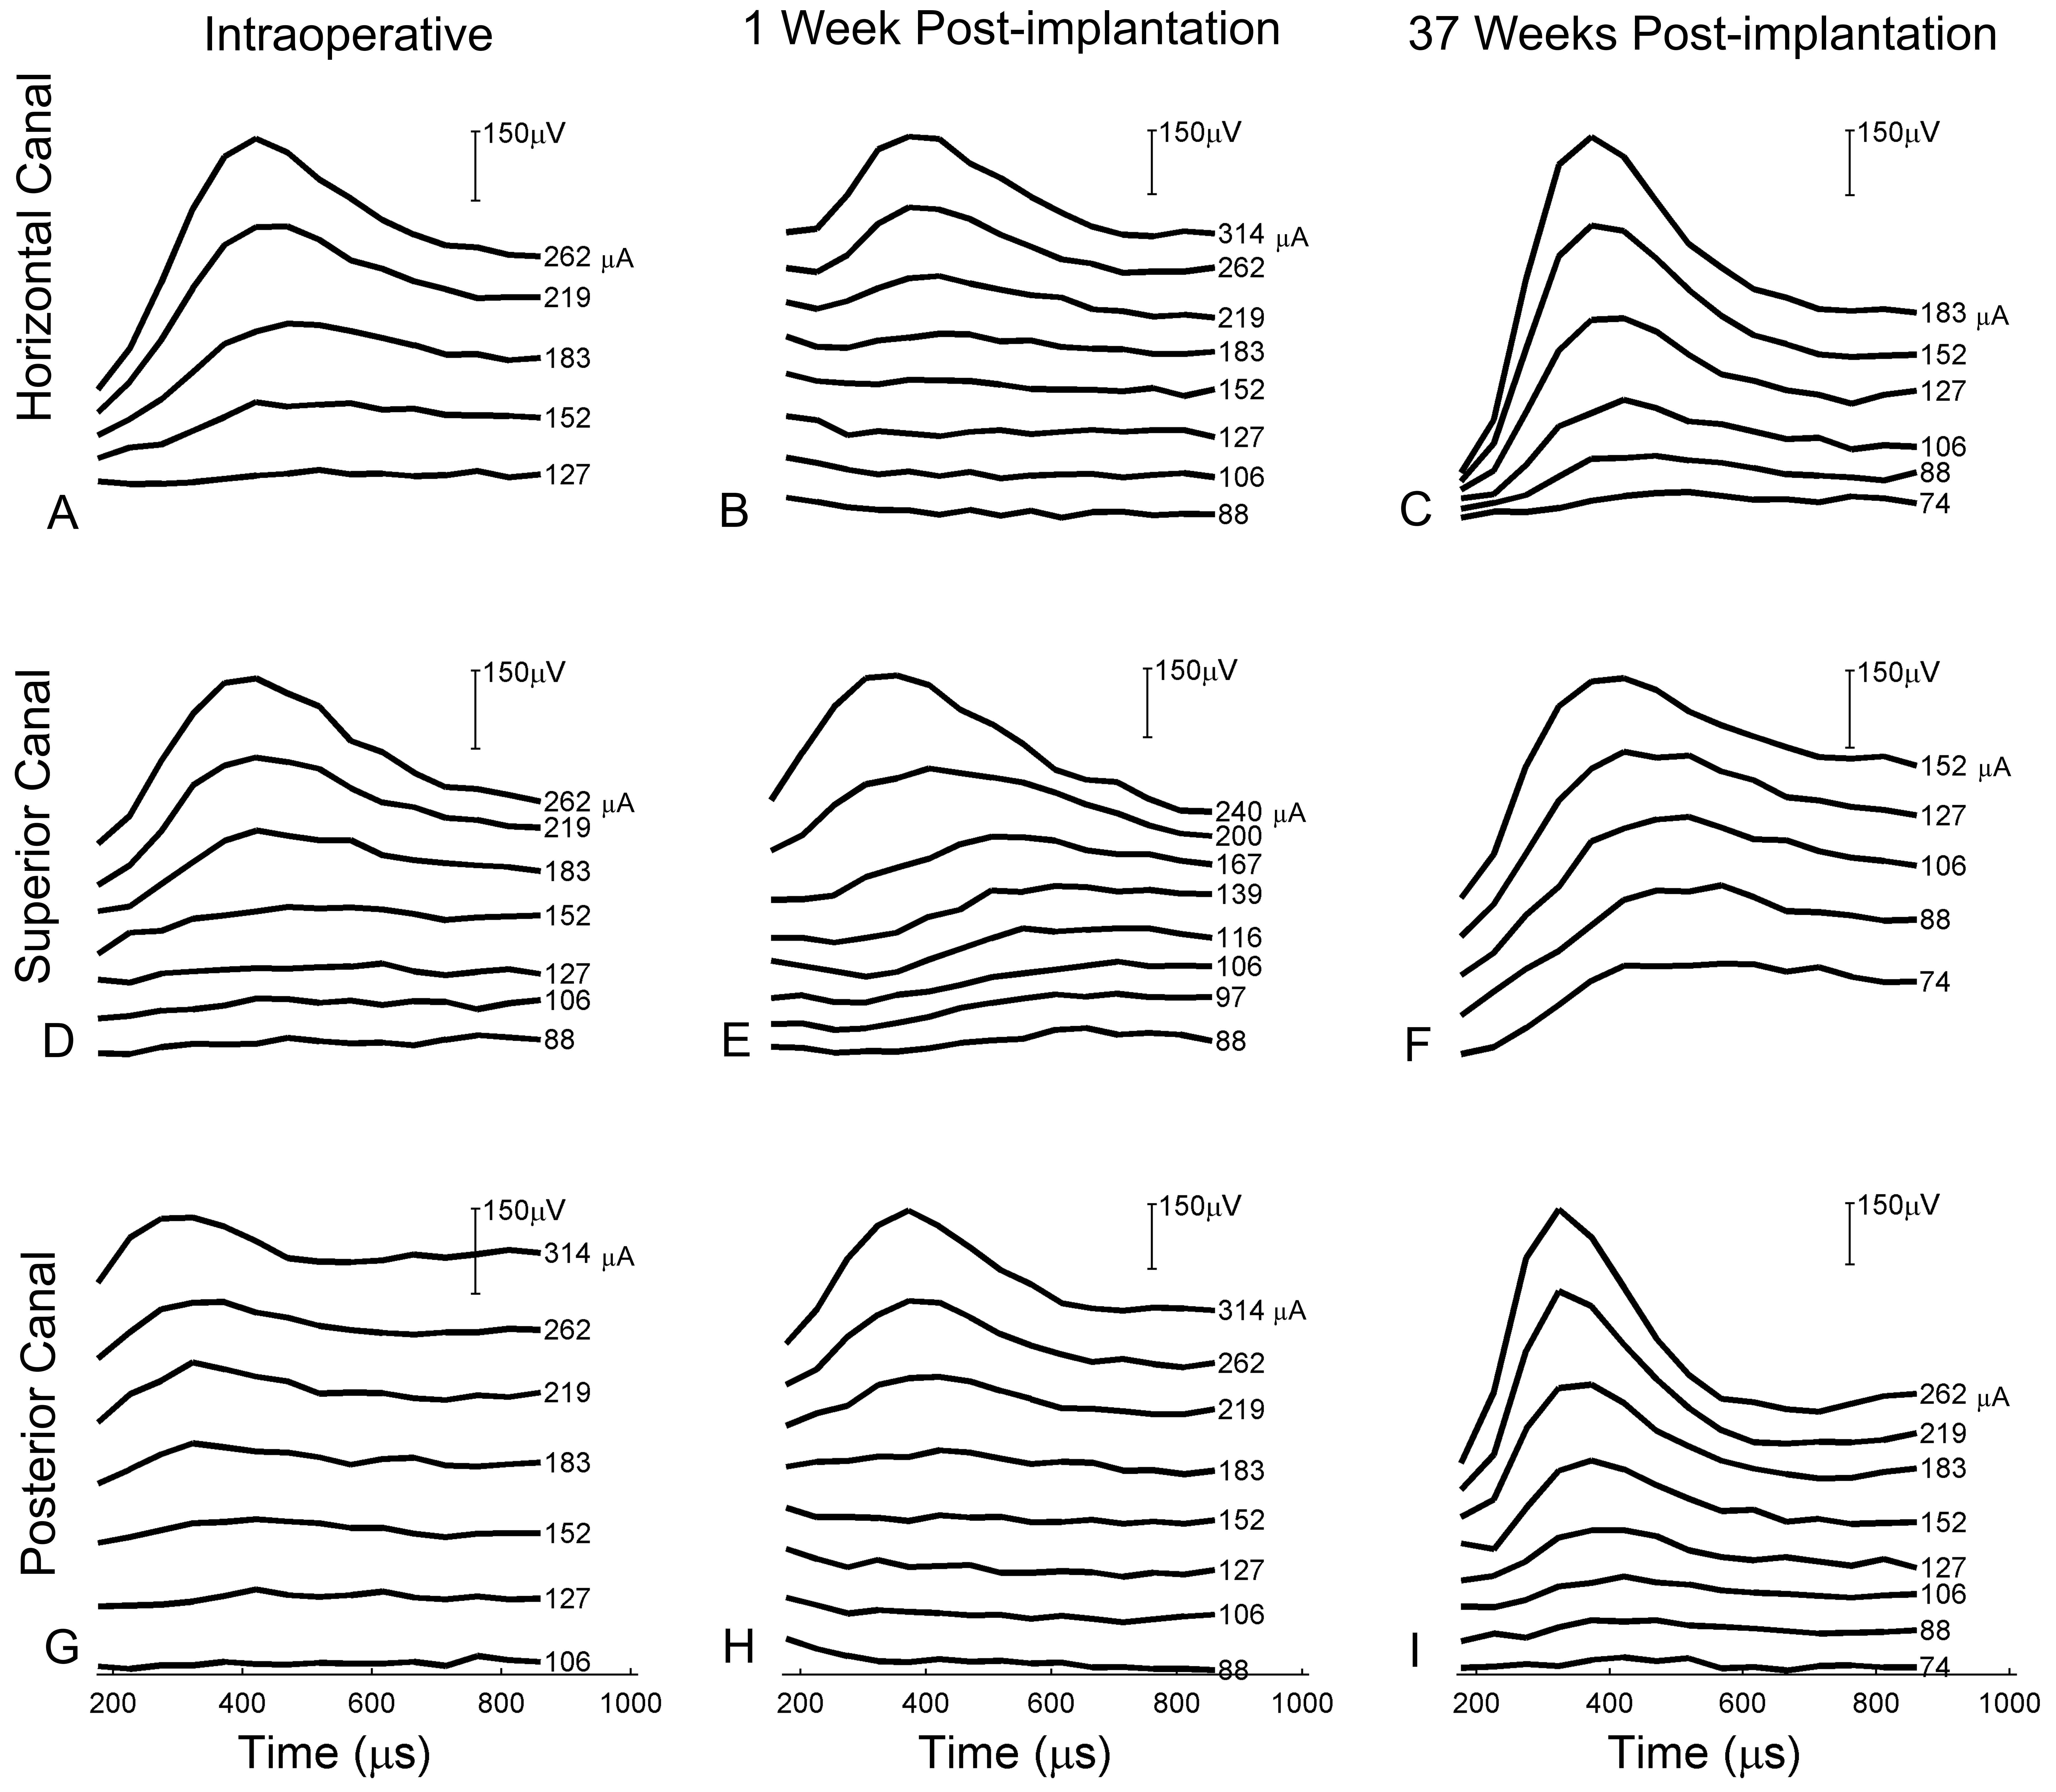

Supplement: NIHMS512515-supplement-5.pdf [file NIHMS512515-supplement-5.pdf]
